# Supplementary material for: Clinical exercise provision in the UK: comparison of staff job titles, roles and qualifications across five specialised exercise services
Source: PubMed Central journal article supplement — BMJ Open Sport Exerc Med. 2022 Jan 24;8(1):e001152. doi: 10.1136/bmjsem-2021-001152 (PMC8788312; doi:10.1136/bmjsem-2021-001152), 2022-01-24
Supplement: bmjsem-2021-001152supp002.pdf [file bmjsem-2021-001152supp002.pdf]

Supplementary Table 1: Cancer service data

| Cancer Service name                             | Complete data Y/N | Clinical Exercise Physiologists Y/N | Exercise Instructors Y/N | Physiotherapists Y/N | Occupational Therapists Y/N |
|-------------------------------------------------|-------------------|-------------------------------------|--------------------------|----------------------|-----------------------------|
| Aintree University Hospitals                    | Y                 | N                                   | N                        | Y                    | N                           |
| Barking, Havering & Redbridge                   | Y                 | N                                   | Y                        | N                    | N                           |
| Barnsley Hospital                               | N                 | -                                   | -                        | -                    | -                           |
| Barts Health NHS trust                          | N                 | -                                   | -                        | -                    | -                           |
| Basildon & Thurrock University hospitals        | Y                 | N                                   | Y                        | N                    | N                           |
| Bedford Hospital NHS trust (Luton)              | N                 | -                                   | -                        | -                    | -                           |
| West Berkshire NHS foundation (royal Berkshire) | N                 | -                                   | -                        | -                    | -                           |
| GM Active Trusts (12)                           | Y                 | N                                   | Y                        | N                    | N                           |
| Bradford teaching hospitals (BEEP)              | Y                 | N                                   | Y                        | N                    | N                           |
| Brighton and Sussex princess royal              | Y                 | N                                   | Y                        | N                    | N                           |
| Calderdale & Huddersfield NHS trust             | Y                 | N                                   | Y                        | N                    | N                           |
| Cambridge Nuffield                              | Y                 | N                                   | Y                        | N                    | N                           |
| Cambridge Addenbrookes hospital                 | Y                 | N                                   | Y                        | Y                    | N                           |
| University of London                            | Y                 | N                                   | N                        | Y                    | Y                           |
| Cancer be fit (west Essex)                      | Y                 | N                                   | Y                        | N                    | N                           |
| City Health care partnership (Hull)             | Y                 | N                                   | N                        | Y                    | N                           |
| Sunderland & South Tyneside / Durham / GH       | Y                 | N                                   | N                        | Y                    | N                           |
| Cornwall partnership NHS (cove)                 | Y                 | N                                   | N                        | Y                    | N                           |
| Croydon Health services NHS trust               | Y                 | N                                   | N                        | Y                    | N                           |
| Dorset county hospital (C`Fit)                  | Y                 | N                                   | Y                        | N                    | N                           |
| East Cheshire NHS (Macclesfield)                | Y                 | N                                   | Y                        | N                    | N                           |
| Lancs & Cumbria                                 | Y                 | N                                   | N                        | Y                    | N                           |
| East Suffolk and North Essex                    | Y                 | N                                   | Y                        | N                    | N                           |
| Move more Herts                                 | Y                 | N                                   | Y                        | N                    | N                           |

| <b>Cancer Service name</b>                              | <b>Complete data Y/N</b> | <b>Clinical Exercise Physiologists Y/N</b> | <b>Exercise Instructors Y/N</b> | <b>Physiotherapists Y/N</b> | <b>Occupational Therapists Y/N</b> |
|---------------------------------------------------------|--------------------------|--------------------------------------------|---------------------------------|-----------------------------|------------------------------------|
| Epsom and St Helier (Epsom Hospital)                    | Y                        | N                                          | N                               | Y                           | N                                  |
| Gloucestershire care services NHS trust                 | Y                        | N                                          | Y                               | N                           | N                                  |
| Guys & St Thomas NHS foundation                         | Y                        | N                                          | N                               | Y                           | N                                  |
| Harrogate & District NHS foundation                     | N                        | -                                          | -                               | -                           | -                                  |
| Humber teaching NHS foundation trust                    | N                        | -                                          | -                               | -                           | -                                  |
| Imperial healthcare NHS trust                           | Y                        | N                                          | Y                               | Y                           | N                                  |
| Kettering general hospital NHS trust                    | N                        | -                                          | -                               | -                           | -                                  |
| Kings college hospital (kings college)                  | Y                        | N                                          | Y                               | Y                           | N                                  |
| Leeds teaching hospitals NHS trust                      | N                        | -                                          | -                               | -                           | -                                  |
| Livewell Plymouth healthcare CIC                        | Y                        | N                                          | Y                               | N                           | N                                  |
| Lewisham and Greenwich NHS                              | N                        | -                                          | -                               | -                           | -                                  |
| Pauls cancer support unit                               | N                        | -                                          | -                               | -                           | -                                  |
| Six physio                                              | N                        | -                                          | -                               | -                           | -                                  |
| Wandsworth move more                                    | Y                        | N                                          | Y                               | Y                           | N                                  |
| Medway and Kent                                         | Y                        | Y                                          | N                               | N                           | N                                  |
| Mid Cheshire / Crewe (everybody Leisure)                | Y                        | N                                          | Y                               | N                           | N                                  |
| Newcastle upon Tyne hospital (Freeman)                  | N                        | -                                          | -                               | -                           | -                                  |
| Norfolk community health & care (Dereham)               | N                        | -                                          | -                               | -                           | -                                  |
| Bristol                                                 | Y                        | N                                          | Y                               | N                           | N                                  |
| North Middlesex University Hospital NHS                 | N                        | -                                          | -                               | -                           | -                                  |
| North West Anglia (Peterborough vivacity)               | Y                        | N                                          | Y                               | N                           | N                                  |
| Northern Devon healthcare NHS trust                     | Y                        | N                                          | Y                               | N                           | N                                  |
| Nottingham city care partnership                        | N                        | -                                          | -                               | -                           | -                                  |
| Oxford Radcliffe hospitals NHS trust                    | Y                        | N                                          | N                               | Y                           | Y                                  |
| Royal Bournemouth & Poole hospital NHS foundation trust | Y                        | N                                          | Y                               | N                           | N                                  |

| Cancer Service name                     | Complete data Y/N | Clinical Exercise Physiologists Y/N | Exercise Instructors Y/N | Physiotherapists Y/N | Occupational Therapists Y/N |
|-----------------------------------------|-------------------|-------------------------------------|--------------------------|----------------------|-----------------------------|
| Royal Marsden (Surrey & Sutton)         | N                 | -                                   | -                        | -                    | -                           |
| Royal Free London NHS                   | Y                 | N                                   | N                        | Y                    | N                           |
| Sheffield Teaching Hospitals (CCG)      | Y                 | N                                   | Y                        | N                    | N                           |
| Sherwood Forest Hospitals (Kings Mill)  | Y                 | N                                   | N                        | Y                    | Y                           |
| Southwark everyone active               | Y                 | N                                   | Y                        | Y                    | N                           |
| Shrewsbury & Telford                    | N                 | -                                   | -                        | -                    | -                           |
| Somerset sports Partnership             | N                 | -                                   | -                        | -                    | -                           |
| South Tees Hospital NHS (Prepwell)      | Y                 | N                                   | Y                        | N                    | N                           |
| Warwickshire                            | N                 | -                                   | -                        | -                    | -                           |
| Southport & Ormskirk hospital           | Y                 | N                                   | N                        | Y                    | Y                           |
| St Helens & Knowsley Teaching           | Y                 | N                                   | Y                        | Y                    | N                           |
| Halton borough                          | N                 | -                                   | -                        | -                    | -                           |
| The Royal Wolverhampton Hospitals       | Y                 | N                                   | Y                        | N                    | N                           |
| Trekstock                               | N                 | -                                   | -                        | -                    | -                           |
| The Whittington Hospital NHS trust      | N                 | -                                   | -                        | -                    | -                           |
| Torbay care trust (Torbay Hospital)     | N                 | -                                   | -                        | -                    | -                           |
| University Southampton (WESFIT)         | Y                 | Y                                   | Y                        | N                    | N                           |
| University hospital Birmingham          | N                 | -                                   | -                        | -                    | -                           |
| Move more cancer charity                | N                 | -                                   | -                        | -                    | -                           |
| University hospital Bristol & Weston    | Y                 | N                                   | N                        | Y                    | N                           |
| University of East Anglia (Prepare ABC) | N                 | -                                   | -                        | -                    | -                           |
| Warrington & Halton Hospitals           | Y                 | N                                   | Y                        | N                    | N                           |
| Wirral community NHS                    | Y                 | Y                                   | Y                        | N                    | N                           |
| Worcester Acute hospitals (Move More)   | Y                 | N                                   | Y                        | N                    | N                           |
| York teaching hospital NHS              | N                 | -                                   | -                        | -                    | -                           |
| Isle of wight                           | N                 | -                                   | -                        | -                    | -                           |

| Cancer Service name                                | Complete data Y/N | Clinical Exercise Physiologists Y/N | Exercise Instructors Y/N | Physiotherapists Y/N | Occupational Therapists Y/N |
|----------------------------------------------------|-------------------|-------------------------------------|--------------------------|----------------------|-----------------------------|
| Belfast health & social care trust                 | Y                 | N                                   | Y                        | N                    | N                           |
| Northern health & social care (Antrim)             | Y                 | N                                   | Y                        | N                    | N                           |
| Northern health & social care (Whiteabbey)         | Y                 | N                                   | Y                        | N                    | N                           |
| Northern health & social care (Mid ulster)         | Y                 | N                                   | Y                        | N                    | N                           |
| Northern health & social care (causeway)           | Y                 | N                                   | Y                        | N                    | N                           |
| South Eastern Health & social care (Ulster)        | Y                 | N                                   | Y                        | N                    | N                           |
| Southern health & social care (Craigavon)          | Y                 | N                                   | Y                        | N                    | N                           |
| southern health & social care (daisy hill)         | Y                 | N                                   | Y                        | N                    | N                           |
| southern health & social care (south Tyrone)       | Y                 | N                                   | Y                        | N                    | N                           |
| Western health & social care (Altna)               | Y                 | N                                   | Y                        | N                    | N                           |
| Western health & social care (Omagh)               | Y                 | N                                   | Y                        | N                    | N                           |
| Aneurin Bevan university health board (Gwent)      | Y                 | N                                   | Y                        | N                    | N                           |
| Aneurin Bevan university health board (Caerphilly) | Y                 | N                                   | Y                        | N                    | N                           |
| Aneurin Bevan university health board (Mon)        | Y                 | N                                   | Y                        | N                    | N                           |
| Aneurin Bevan university health board (Torfaen)    | Y                 | N                                   | Y                        | N                    | N                           |
| Aneurin Bevan university health board (Newport)    | Y                 | N                                   | Y                        | N                    | N                           |
| Betsi Cadwaladr (Anglesey)                         | Y                 | N                                   | Y                        | N                    | N                           |
| Betsi Cadwaladr (Conway)                           | Y                 | N                                   | Y                        | N                    | N                           |
| Betsi Cadwaladr (Gwynedd)                          | Y                 | N                                   | Y                        | N                    | N                           |
| Betsi Cadwaladr (Den)                              | Y                 | N                                   | Y                        | N                    | N                           |
| Betsi Cadwaladr (Wrexham)                          | Y                 | N                                   | Y                        | N                    | N                           |
| Betsi Cadwaladr (Flintshire)                       | Y                 | N                                   | Y                        | N                    | N                           |
| Vale of Glamorgan                                  | Y                 | N                                   | Y                        | N                    | N                           |
| Cardiff university health board                    | Y                 | N                                   | Y                        | N                    | N                           |
| Cwm Taf (Prince of Wales Hospital)                 | Y                 | N                                   | Y                        | N                    | N                           |
| Cwm Taf (Glam & Charles)                           | Y                 | N                                   | Y                        | N                    | N                           |
| Hywel Dda University HB (Bronglais)                | Y                 | N                                   | Y                        | N                    | N                           |

| Cancer Service name                     | Complete data Y/N | Clinical Exercise Physiologists Y/N | Exercise Instructors Y/N | Physiotherapists Y/N | Occupational Therapists Y/N |
|-----------------------------------------|-------------------|-------------------------------------|--------------------------|----------------------|-----------------------------|
| Hywel Dda University HB (Glang)         | Y                 | N                                   | Y                        | N                    | N                           |
| Hywel Dda University HB (Haverfordwest) | Y                 | N                                   | Y                        | N                    | N                           |
| Powys Teaching HB (Rhayadar)            | Y                 | N                                   | Y                        | N                    | N                           |
| Powys Teaching HB (Brecon War mem)      | Y                 | N                                   | Y                        | N                    | N                           |
| Bridgend                                | Y                 | N                                   | Y                        | N                    | N                           |
| Swansea                                 | Y                 | N                                   | Y                        | N                    | N                           |
| Swansea Bay HB (Neath & PT)             | Y                 | N                                   | Y                        | N                    | N                           |
| Dumfries & Galloway                     | N                 | -                                   | -                        | -                    | -                           |
| Dundee                                  | N                 | -                                   | -                        | -                    | -                           |
| East Ayrshire                           | Y                 | N                                   | Y                        | N                    | N                           |
| East Lothian                            | Y                 | N                                   | Y                        | N                    | N                           |
| East Renfresshire                       | Y                 | N                                   | Y                        | N                    | N                           |
| Edinburgh                               | Y                 | N                                   | Y                        | N                    | N                           |
| Fife                                    | N                 | -                                   | -                        | -                    | -                           |
| Glasgow & Clyde (South Glasgow)         | Y                 | N                                   | Y                        | N                    | N                           |
| Highland                                | Y                 | N                                   | Y                        | N                    | N                           |
| Inverclyde                              | Y                 | N                                   | Y                        | N                    | N                           |
| Moray                                   | N                 | -                                   | -                        | -                    | -                           |
| North Ayrshire                          | N                 | -                                   | -                        | -                    | -                           |
| North Lanarkshire                       | Y                 | N                                   | Y                        | N                    | N                           |
| Perth & Kinross                         | Y                 | N                                   | Y                        | N                    | N                           |
| Renfresshire                            | Y                 | N                                   | Y                        | N                    | N                           |
| South Ayrshire                          | N                 | -                                   | -                        | -                    | -                           |
| Western Isles                           | Y                 | N                                   | Y                        | N                    | N                           |
| Borders                                 | Y                 | N                                   | Y                        | N                    | N                           |
| Sport Aberdeen                          | Y                 | N                                   | Y                        | N                    | N                           |
| Aberdeenshire                           | Y                 | N                                   | Y                        | N                    | N                           |

| <b>Cancer Service name</b> | <b>Complete data Y/N</b> | <b>Clinical Exercise Physiologists Y/N</b> | <b>Exercise Instructors Y/N</b> | <b>Physiotherapists Y/N</b> | <b>Occupational Therapists Y/N</b> |
|----------------------------|--------------------------|--------------------------------------------|---------------------------------|-----------------------------|------------------------------------|
| Angus                      | Y                        | N                                          | Y                               | N                           | N                                  |
