# Supplementary material for: Clinical exercise provision in the UK: comparison of staff job titles, roles and qualifications across five specialised exercise services
Source: PubMed Central journal article supplement — BMJ Open Sport Exerc Med. 2022 Jan 24;8(1):e001152. doi: 10.1136/bmjsem-2021-001152 (PMC8788312; doi:10.1136/bmjsem-2021-001152), 2022-01-24
Supplement: bmjsem-2021-001152supp003.pdf [file bmjsem-2021-001152supp003.pdf]

Supplementary Table 2: Cardiac service data

| Cardiac Service name                      | Complete data Y/N | Clinical Exercise Physiologists Y/N | Exercise Instructors Y/N | Physiotherapists Y/N | Occupational Therapists Y/N |
|-------------------------------------------|-------------------|-------------------------------------|--------------------------|----------------------|-----------------------------|
| Action Heart, Dudley                      | Y                 | Y                                   | Y                        | N                    | N                           |
| Aintree University Hospitals              | Y                 | N                                   | N                        | Y                    | N                           |
| Airedale NHS foundation                   | Y                 | N                                   | N                        | Y                    | N                           |
| Alexandra Hospital Cheadle                | Y                 | N                                   | N                        | Y                    | N                           |
| Anglian Community CIC                     | Y                 | N                                   | Y                        | N                    | N                           |
| Ashford & St.Peters Hospitals             | Y                 | N                                   | Y                        | N                    | N                           |
| Barking, Havering & Redbridge             | Y                 | N                                   | Y                        | Y                    | N                           |
| Barnsley Hospital                         | Y                 | N                                   | Y                        | Y                    | N                           |
| Barts Health NHS trust                    | Y                 | Y                                   | Y                        | N                    | N                           |
| Basildon & Thurrock University hospitals  | Y                 | N                                   | Y                        | Y                    | N                           |
| Bedford Hospital NHS trust                | Y                 | N                                   | Y                        | Y                    | N                           |
| Berkshire Healthcare NHS foundation       | Y                 | N                                   | Y                        | N                    | N                           |
| Birmingham Community healthcare           | Y                 | Y                                   | Y                        | N                    | N                           |
| Blackpool, Flyde and Wyre                 | Y                 | N                                   | N                        | Y                    | N                           |
| Bolton Hospitals NHS trust                | Y                 | N                                   | N                        | Y                    | N                           |
| Bradford teaching hospitals               | N                 | -                                   | -                        | -                    | -                           |
| Brighton and Sussex princess royal        | Y                 | N                                   | N                        | Y                    | N                           |
| Brighton and Sussex royal county Hospital | Y                 | N                                   | N                        | Y                    | N                           |
| Buckinghamshire Hospital NHS trust        | N                 | -                                   | -                        | -                    | -                           |
| Burton (Queens) Hospital                  | Y                 | N                                   | Y                        | N                    | N                           |
| Calderdale & Huddersfield NHS trust       | Y                 | N                                   | Y                        | Y                    | N                           |
| Cambridge university hospital             | Y                 | Y                                   | N                        | N                    | N                           |

| <b>Cardiac Service name</b>                | <b>Complete data Y/N</b> | <b>Clinical Exercise Physiologists Y/N</b> | <b>Exercise Instructors Y/N</b> | <b>Physiotherapists Y/N</b> | <b>Occupational Therapists Y/N</b> |
|--------------------------------------------|--------------------------|--------------------------------------------|---------------------------------|-----------------------------|------------------------------------|
| Cambridgeshire & Peterborough trust        | Y                        | N                                          | Y                               | N                           | N                                  |
| Central & NW London Foundation trust       | Y                        | N                                          | Y                               | N                           | N                                  |
| Central London community healthcare        | Y                        | Y                                          | N                               | Y                           | N                                  |
| Chesterfield royal hospital trust          | Y                        | N                                          | N                               | Y                           | N                                  |
| City Health care partnership (Hull)        | Y                        | N                                          | Y                               | N                           | N                                  |
| City Hospitals Sunderland                  | Y                        | N                                          | Y                               | N                           | N                                  |
| Cornwall partnership NHS                   | N                        | -                                          | -                               | -                           | -                                  |
| Countess of Chester hospital               | Y                        | Y                                          | N                               | Y                           | N                                  |
| County Durham and Darlington NHS           | Y                        | N                                          | Y                               | N                           | N                                  |
| CP&R (private)                             | Y                        | Y                                          | N                               | N                           | N                                  |
| Croydon Health services NHS trust          | Y                        | N                                          | Y                               | Y                           | N                                  |
| Dartford and Gravesham NHS                 | Y                        | N                                          | Y                               | Y                           | N                                  |
| Derby hospitals NHS foundation             | Y                        | N                                          | N                               | Y                           | N                                  |
| Derbyshire community health (Chesterfield) | Y                        | Y                                          | Y                               | N                           | N                                  |
| Derbyshire community health (high peaks)   | Y                        | Y                                          | Y                               | N                           | N                                  |
| Doncaster & Bassetlaw Hospitals NHS trust  | Y                        | N                                          | N                               | Y                           | N                                  |
| Dorset county hospital NHS trust           | Y                        | N                                          | Y                               | N                           | N                                  |
| East and North Hertfordshire NHS trust     | Y                        | N                                          | N                               | Y                           | N                                  |
| East Cheshire NHS (Macclesfield)           | Y                        | N                                          | Y                               | N                           | N                                  |
| East Coast CIC (Gt Yarmouth)               | Y                        | N                                          | Y                               | N                           | N                                  |
| East Lancashire NHS trust                  | Y                        | N                                          | N                               | Y                           | N                                  |
| East London Foundation (Newham)            | Y                        | N                                          | Y                               | N                           | N                                  |
| East Suffolk and North Essex (Colchester)  | Y                        | N                                          | Y                               | Y                           | N                                  |

| <b>Cardiac Service name</b>                | <b>Complete data Y/N</b> | <b>Clinical Exercise Physiologists Y/N</b> | <b>Exercise Instructors Y/N</b> | <b>Physiotherapists Y/N</b> | <b>Occupational Therapists Y/N</b> |
|--------------------------------------------|--------------------------|--------------------------------------------|---------------------------------|-----------------------------|------------------------------------|
| East Suffolk and North Essex (Ipswich)     | Y                        | N                                          | Y                               | Y                           | N                                  |
| East Sussex healthcare (conquest)          | Y                        | N                                          | Y                               | N                           | N                                  |
| East Sussex healthcare (Eastbourne)        | Y                        | N                                          | Y                               | N                           | N                                  |
| East Yorkshire hospital (east riding)      | Y                        | N                                          | Y                               | N                           | N                                  |
| Epsom and St Hellier (Epsom Hospital)      | Y                        | N                                          | Y                               | Y                           | N                                  |
| Epsom and St Hellier (St Hellier Hospital) | Y                        | N                                          | Y                               | N                           | N                                  |
| Ergotec health studio                      | N                        | -                                          | -                               | -                           | -                                  |
| Essex partnership university (EPUT)        | Y                        | N                                          | Y                               | N                           | N                                  |
| Frimley health (Frimley hospital)          | Y                        | N                                          | Y                               | N                           | N                                  |
| Frimley health (Wexham park hospital)      | Y                        | N                                          | Y                               | N                           | N                                  |
| Gateshead health NHS foundation trust      | N                        | -                                          | -                               | -                           | -                                  |
| George Eliot NHS trust                     | Y                        | N                                          | N                               | Y                           | N                                  |
| Gloucestershire care services nhs trust    | Y                        | N                                          | Y                               | N                           | N                                  |
| Great Western Hospitals NHS trust          | Y                        | N                                          | Y                               | N                           | N                                  |
| Guys & St Thomas NHS foundation            | Y                        | N                                          | N                               | Y                           | N                                  |
| Hampshire Hospitals NHS foundation         | Y                        | N                                          | Y                               | N                           | N                                  |
| Harrogate & District NHS foundation        | Y                        | N                                          | Y                               | Y                           | N                                  |
| HCA Healthcare                             | N                        | -                                          | -                               | -                           | -                                  |
| Heart of England NHS trust (Good hope)     | Y                        | Y                                          | N                               | N                           | N                                  |
| Heart of England NHS trust (Heartlands)    | Y                        | Y                                          | N                               | N                           | N                                  |
| Heartsure private CR and prevention        | N                        | -                                          | -                               | -                           | -                                  |
| Heywood, middleton & Rochdale (BOC)        | Y                        | N                                          | Y                               | N                           | N                                  |
| Homerton University hospital NHS trust     | Y                        | N                                          | Y                               | Y                           | N                                  |
| Hounslow & Richmond NHS trust (Teddington) | Y                        | Y                                          | N                               | N                           | N                                  |

| <b>Cardiac Service name</b>                        | <b>Complete data Y/N</b> | <b>Clinical Exercise Physiologists Y/N</b> | <b>Exercise Instructors Y/N</b> | <b>Physiotherapists Y/N</b> | <b>Occupational Therapists Y/N</b> |
|----------------------------------------------------|--------------------------|--------------------------------------------|---------------------------------|-----------------------------|------------------------------------|
| Humber teaching NHS foundation trust               | Y                        | N                                          | Y                               | Y                           | N                                  |
| Imperial healthcare NHS trust                      | Y                        | N                                          | Y                               | N                           | N                                  |
| Isle of Wight NHS trust                            | Y                        | N                                          | Y                               | Y                           | N                                  |
| Kent community health NHS trust                    | Y                        | Y                                          | N                               | N                           | N                                  |
| Kettering general hospital NHS trust               | N                        | -                                          | -                               | -                           | -                                  |
| Kings college hospital (kings college)             | N                        | -                                          | -                               | -                           | -                                  |
| Kings college hospital (royal princess university) | Y                        | N                                          | Y                               | N                           | N                                  |
| Kingston hospital NHS trust                        | N                        | -                                          | -                               | -                           | -                                  |
| Lancashire teaching hospital                       | Y                        | N                                          | Y                               | N                           | N                                  |
| Leeds teaching hospitals NHS trust                 | Y                        | N                                          | Y                               | N                           | N                                  |
| Lincolnshire community health services             | Y                        | N                                          | Y                               | Y                           | N                                  |
| Liverpool heart & chest hospital                   | Y                        | Y                                          | N                               | N                           | N                                  |
| Livewell Plymouth healthcare CIC                   | Y                        | Y                                          | N                               | N                           | N                                  |
| Locala community partnership CIC (Huddersfield)    | Y                        | Y                                          | Y                               | N                           | N                                  |
| London NW (Harrow community services)              | N                        | -                                          | -                               | -                           | -                                  |
| Luton & Dunstable NHS trust                        | Y                        | N                                          | Y                               | Y                           | N                                  |
| Maidstone & Tunbridge (Maidstone Hospitals         | Y                        | N                                          | N                               | N                           | N                                  |
| Maidstone & Tunbridge (T wells Hospital)           | Y                        | N                                          | Y                               | N                           | N                                  |
| Manchester University (heart centre)               | Y                        | N                                          | N                               | Y                           | N                                  |
| Medway community healthcare                        | Y                        | Y                                          | N                               | N                           | N                                  |

| <b>Cardiac Service name</b>                         | <b>Complete data Y/N</b> | <b>Clinical Exercise Physiologists Y/N</b> | <b>Exercise Instructors Y/N</b> | <b>Physiotherapists Y/N</b> | <b>Occupational Therapists Y/N</b> |
|-----------------------------------------------------|--------------------------|--------------------------------------------|---------------------------------|-----------------------------|------------------------------------|
| Mid Cheshire hospital NHS trust                     | Y                        | N                                          | Y                               | Y                           | N                                  |
| Mid Essex hospital services (Broomfield)            | Y                        | Y                                          | N                               | N                           | N                                  |
| Mid Yorkshire Hospitals (Pontefract)                | Y                        | N                                          | N                               | Y                           | N                                  |
| Milton Keynes Hospital NHS trust                    | Y                        | N                                          | Y                               | N                           | N                                  |
| Newcastle upon Tyne hospital (com cardiology)       | Y                        | N                                          | Y                               | N                           | N                                  |
| Newcastle upon Tyne hospital (Freeman)              | Y                        | N                                          | N                               | N                           | N                                  |
| Norfolk & Norwich University hospital NHS           | Y                        | N                                          | N                               | Y                           | N                                  |
| Norfolk community health & care (Dereham)           | Y                        | N                                          | N                               | Y                           | N                                  |
| North Bristol (Southmead)                           | Y                        | N                                          | Y                               | Y                           | N                                  |
| North Cumbria integrated care (Cumberland in)       | Y                        | N                                          | N                               | N                           | N                                  |
| North Cumbria integrated care (W. Cumberland)       | Y                        | N                                          | N                               | Y                           | N                                  |
| North Middlesex University Hospital NHS             | Y                        | N                                          | N                               | Y                           | N                                  |
| North Tees & Hartlepool NHS trust (Community)       | Y                        | N                                          | Y                               | N                           | N                                  |
| North Tees & Hartlepool NHS trust (NT)              | Y                        | N                                          | Y                               | N                           | N                                  |
| North West Anglia (Peterborough city hospital)      | Y                        | N                                          | N                               | Y                           | N                                  |
| Northampton General hospital NHS trust              | Y                        | N                                          | Y                               | N                           | N                                  |
| Northern Devon healthcare NHS trust                 | Y                        | N                                          | N                               | Y                           | N                                  |
| Northern Lincolnshire & Goole Hospital (Scunthorpe) | Y                        | N                                          | Y                               | N                           | N                                  |
| Northern Lincolnshire & Goole Hospital (Diana)      | Y                        | N                                          | N                               | Y                           | N                                  |
| Northumbria healthcare NHS (all sectors)            | Y                        | N                                          | Y                               | N                           | N                                  |
| Northumbria healthcare NHS (community cardi)        | Y                        | N                                          | Y                               | N                           | N                                  |

| <b>Cardiac Service name</b>                 | <b>Complete data Y/N</b> | <b>Clinical Exercise Physiologists Y/N</b> | <b>Exercise Instructors Y/N</b> | <b>Physiotherapists Y/N</b> | <b>Occupational Therapists Y/N</b> |
|---------------------------------------------|--------------------------|--------------------------------------------|---------------------------------|-----------------------------|------------------------------------|
| Nottingham city care partnership            | Y                        | N                                          | N                               | Y                           | N                                  |
| Nottingham university hospitals             | Y                        | N                                          | Y                               | N                           | N                                  |
| Nuffield health (Leeds)                     | N                        | -                                          | -                               | -                           | -                                  |
| Oxford Radcliffe hospitals NHS trust        | Y                        | Y                                          | N                               | N                           | N                                  |
| Oxleas NHS foundation trust                 | Y                        | N                                          | Y                               | N                           | N                                  |
| Papworth Hospital NHS trust                 | Y                        | Y                                          | Y                               | N                           | N                                  |
| Pennine acute hospitals (N.Manchester)      | Y                        | N                                          | Y                               | Y                           | N                                  |
| Pennine acute hospitals (R.Oldham)          | Y                        | N                                          | N                               | Y                           | N                                  |
| Poole hospital NHS foundation trust         | N                        | -                                          | -                               | -                           | -                                  |
| Portsmouth Hospitals NHS (Queen Alex)       | Y                        | N                                          | N                               | N                           | N                                  |
| Rotherham NHS (Community health centre)     | Y                        | N                                          | N                               | Y                           | N                                  |
| Roundhay physio clinic                      | N                        | -                                          | -                               | -                           | -                                  |
| Royal Brompton & Harefield                  | Y                        | Y                                          | N                               | N                           | N                                  |
| Royal Deven & Exeter NHS trust              | Y                        | N                                          | N                               | Y                           | N                                  |
| Royal Free London NHS (Chase farm)          | Y                        | N                                          | Y                               | N                           | N                                  |
| Royal Free London NHS (Royal Free Hospital) | Y                        | N                                          | N                               | Y                           | N                                  |
| Royal Liverpool & Broadgreen                | Y                        | Y                                          | N                               | N                           | N                                  |
| Royal Surrey County Hospital                | Y                        | N                                          | Y                               | N                           | N                                  |
| Royal United Hospital Bath NHS              | Y                        | N                                          | Y                               | N                           | N                                  |
| Salford Royal NHS foundation                | Y                        | Y                                          | N                               | N                           | N                                  |
| Salisbury NHS (District hospital)           | Y                        | N                                          | N                               | N                           | N                                  |

| <b>Cardiac Service name</b>                   | <b>Complete data Y/N</b> | <b>Clinical Exercise Physiologists Y/N</b> | <b>Exercise Instructors Y/N</b> | <b>Physiotherapists Y/N</b> | <b>Occupational Therapists Y/N</b> |
|-----------------------------------------------|--------------------------|--------------------------------------------|---------------------------------|-----------------------------|------------------------------------|
| Sandwell & West Birmingham (Sandwell)         | Y                        | Y                                          | N                               | N                           | N                                  |
| Sheffield Teaching Hospitals                  | Y                        | N                                          | N                               | Y                           | N                                  |
| Sherwood Forest Hospitals (Kings Mill)        | Y                        | N                                          | N                               | Y                           | N                                  |
| Sherwood Forest Hospitals (Newark)            | Y                        | N                                          | N                               | Y                           | N                                  |
| Shrewsbury & Telford                          | Y                        | N                                          | N                               | Y                           | N                                  |
| Solent NHS trust                              | N                        | -                                          | -                               | -                           | -                                  |
| Somerset Partnership NHS                      | Y                        | N                                          | Y                               | N                           | N                                  |
| South Tees Hospital NHS                       | Y                        | N                                          | Y                               | N                           | N                                  |
| South Tyneside                                | Y                        | N                                          | Y                               | N                           | N                                  |
| South Warwickshire                            | Y                        | Y                                          | N                               | N                           | N                                  |
| Southend University hospital                  | Y                        | N                                          | N                               | Y                           | N                                  |
| Southport & Ormskirk hospital                 | Y                        | N                                          | N                               | Y                           | N                                  |
| St George's healthcare NHS trust              | Y                        | N                                          | N                               | Y                           | N                                  |
| St Helens & Knowsley Teaching (Halton & St H) | Y                        | N                                          | Y                               | Y                           | N                                  |
| Stockport NHS foundation (Stepping Hill)      | N                        | -                                          | -                               | -                           | -                                  |
| Surrey & Sussex Healthcare (Crawley)          | N                        | -                                          | -                               | -                           | -                                  |
| Surrey & Sussex Healthcare (East Surrey)      | Y                        | N                                          | N                               | Y                           | N                                  |
| Tameside hospital NHS trust                   | Y                        | N                                          | N                               | Y                           | N                                  |
| Taunton & Somerset (Musgrove park)            | Y                        | N                                          | Y                               | N                           | N                                  |
| The Hillingdon hospital NHS trust             | Y                        | N                                          | Y                               | N                           | N                                  |
| The Lewisham hospitals NHS trust              | Y                        | N                                          | Y                               | N                           | N                                  |
| The princess Alexandra hospital NHS trust     | N                        | -                                          | -                               | -                           | -                                  |
| The Queen Elizabeth hospital NHS (Kings Lynn) | Y                        | N                                          | N                               | Y                           | N                                  |
| The Royal Bournemouth and Christchurch        | Y                        | N                                          | Y                               | N                           | N                                  |
| The Royal Wolverhampton Hospitals             | Y                        | Y                                          | N                               | N                           | N                                  |

| Cardiac Service name                            | Complete data Y/N | Clinical Exercise Physiologists Y/N | Exercise Instructors Y/N | Physiotherapists Y/N | Occupational Therapists Y/N |
|-------------------------------------------------|-------------------|-------------------------------------|--------------------------|----------------------|-----------------------------|
| The Sherwood Clinic (Heartsmart)                | Y                 | N                                   | N                        | Y                    | N                           |
| The Whittington Hospital NHS trust              | Y                 | N                                   | Y                        | N                    | N                           |
| Torbay care trust (Torbay Hospital)             | Y                 | N                                   | Y                        | N                    | N                           |
| University college London (The heart hospital)  | N                 | -                                   | -                        | -                    | -                           |
| University hospital Birmingham                  | Y                 | N                                   | N                        | Y                    | N                           |
| University hospital south Manchester (W.sh)     | Y                 | N                                   | N                        | Y                    | N                           |
| University hospital Bristol (Bristol Royal)     | Y                 | N                                   | N                        | Y                    | N                           |
| University hospital Coventry & Warwickshire     | Y                 | Y                                   | Y                        | N                    | N                           |
| University hospitals of Leicester               | Y                 | Y                                   | N                        | N                    | N                           |
| University hospitals of Morecambe bay (Lanc)    | Y                 | N                                   | N                        | Y                    | N                           |
| University hospitals of Morecambe bay (WM)      | Y                 | N                                   | N                        | Y                    | N                           |
| University hospitals of Morecambe bay (F`ness)  | Y                 | N                                   | N                        | Y                    | N                           |
| North Midlands hospitals (Staffs & royal Stoke) | Y                 | Y                                   | N                        | N                    | N                           |
| University Hospitals Plymouth                   | N                 | -                                   | -                        | -                    | -                           |
| Walsall cardiac rehab (heartcare)               | Y                 | Y                                   | N                        | N                    | N                           |
| Warrington & Halton Hospitals                   | Y                 | Y                                   | N                        | N                    | N                           |
| West Suffolk community services                 | N                 | -                                   | -                        | -                    | -                           |
| West Suffolk hospitals NHS trust                | Y                 | N                                   | N                        | Y                    | N                           |
| Western Sussex hospitals (Southlands)           | Y                 | N                                   | N                        | Y                    | N                           |
| Western Sussex hospitals (St Richards)          | Y                 | N                                   | N                        | Y                    | N                           |
| Weston Area health NHS trust (Western Gen)      | Y                 | N                                   | N                        | Y                    | N                           |
| Wirral community NHS                            | Y                 | Y                                   | N                        | N                    | N                           |
| Worcester Acute hospitals (Alex)                | Y                 | N                                   | N                        | Y                    | N                           |
| Worcester Acute hospitals (Kiddi)               | Y                 | N                                   | Y                        | N                    | N                           |
| Worcester Acute hospitals (Royal)               | Y                 | N                                   | Y                        | N                    | N                           |
| Wrightington, Wigan & Leigh                     | Y                 | N                                   | N                        | Y                    | N                           |



| <b>Cardiac Service name</b>                    | <b>Complete data Y/N</b> | <b>Clinical Exercise Physiologists Y/N</b> | <b>Exercise Instructors Y/N</b> | <b>Physiotherapists Y/N</b> | <b>Occupational Therapists Y/N</b> |
|------------------------------------------------|--------------------------|--------------------------------------------|---------------------------------|-----------------------------|------------------------------------|
| Wye Valley NHS                                 | Y                        | N                                          | Y                               | N                           | N                                  |
| Yeovil district hospital NHS                   | Y                        | N                                          | Y                               | N                           | N                                  |
| York teaching hospital NHS                     | Y                        | N                                          | N                               | Y                           | N                                  |
| Your Healthcare CIC                            | Y                        | N                                          | Y                               | Y                           | N                                  |
| Belfast health & social care trust             | Y                        | N                                          | N                               | Y                           | N                                  |
| Northern health & social care (Antrim)         | Y                        | N                                          | N                               | N                           | N                                  |
| Northern health & social care (Whiteabbey)     | Y                        | N                                          | N                               | N                           | N                                  |
| Northern health & social care (Mid ulster)     | Y                        | N                                          | N                               | Y                           | N                                  |
| Northern health & social care (causeway)       | Y                        | N                                          | N                               | Y                           | N                                  |
| South Eastern Health & social care (Ulster)    | Y                        | N                                          | N                               | Y                           | N                                  |
| Southern health & social care (Craigavon)      | Y                        | N                                          | N                               | Y                           | N                                  |
| southern health & social care (daisy hill)     | Y                        | N                                          | N                               | Y                           | N                                  |
| southern health & social care (south Tyrone)   | Y                        | N                                          | N                               | Y                           | N                                  |
| Western health & social care (Altna)           | Y                        | N                                          | Y                               | N                           | N                                  |
| Western health & social care (Omagh)           | N                        | -                                          | -                               | -                           | -                                  |
| Jersey General hospital                        | N                        | -                                          | -                               | -                           | -                                  |
| Princes Elizabeth Hospital (Guernsey)          | Y                        | Y                                          | N                               | N                           | N                                  |
| Aneurin Bevan university health board (County) | Y                        | N                                          | Y                               | N                           | N                                  |
| Aneurin Bevan university health board (Nevill) | Y                        | N                                          | Y                               | N                           | N                                  |
| Aneurin Bevan university health board (St. w)  | Y                        | N                                          | Y                               | N                           | N                                  |
| Aneurin Bevan university health board (Ysbyty) | Y                        | N                                          | Y                               | N                           | N                                  |
| Betsi Cadwaladr (NW Cardiac rehab)             | Y                        | N                                          | Y                               | N                           | N                                  |
| Betsi Cadwaladr (Wrexham)                      | Y                        | N                                          | Y                               | N                           | N                                  |
| Betsi Cadwaladr (Llandudno & Ysbyty)           | Y                        | N                                          | Y                               | N                           | N                                  |
| Cardiff & Vale university health board         | Y                        | N                                          | N                               | Y                           | N                                  |

| Cardiac Service name                    | Complete data Y/N | Clinical Exercise Physiologists Y/N | Exercise Instructors Y/N | Physiotherapists Y/N | Occupational Therapists Y/N |
|-----------------------------------------|-------------------|-------------------------------------|--------------------------|----------------------|-----------------------------|
| Cwm Taf (Prince of Wales Hospital)      | Y                 | N                                   | N                        | Y                    | N                           |
| Cwm Taf (Glam & Charles)                | Y                 | N                                   | N                        | Y                    | N                           |
| Hywel Dda University HB (Bronglais)     | Y                 | N                                   | Y                        | N                    | N                           |
| Hywel Dda University HB (Glang)         | Y                 | N                                   | N                        | Y                    | N                           |
| Hywel Dda University HB (Haverfordwest) | Y                 | N                                   | Y                        | N                    | N                           |
| Powys Teaching HB (Rhayadar)            | Y                 | N                                   | Y                        | Y                    | N                           |
| Powys Teaching HB (Brecon War mem)      | Y                 | N                                   | Y                        | Y                    | N                           |
| Swansea Bay HB (Morrision & Singleton)  | Y                 | N                                   | Y                        | Y                    | N                           |
| Swansea Bay HB (Neath & PT)             | Y                 | N                                   | N                        | Y                    | N                           |
| Dumfries & Galloway Cluden Cardiac unit | N                 | -                                   | -                        | -                    | -                           |
| Borders general hospital Melrose        | N                 | -                                   | -                        | -                    | -                           |
| Ayrshire & Arran (Ayr Hospital)         | Y                 | N                                   | N                        | Y                    | N                           |
| Arran Cardiac rehab                     | Y                 | N                                   | N                        | Y                    | N                           |
| Crosshouse hospital Kilmarnock          | Y                 | N                                   | N                        | Y                    | N                           |
| Hairmyers hospital east Kilbride        | Y                 | N                                   | N                        | Y                    | N                           |
| University hospital Wishaw              | Y                 | N                                   | N                        | Y                    | N                           |
| University hospital Monklands           | Y                 | N                                   | N                        | Y                    | N                           |
| Glasgow & Clyde (South Glasgow)         | Y                 | N                                   | N                        | Y                    | N                           |
| Glasgow & Clyde (NE / West Glasgow)     | Y                 | N                                   | N                        | Y                    | N                           |
| West Lothian (St Johns)                 | Y                 | N                                   | N                        | Y                    | N                           |
| Astley Ainsley Hospital Edinburgh       | Y                 | N                                   | N                        | Y                    | N                           |
| Royal Infirmary Edinburgh               | Y                 | N                                   | Y                        | Y                    | N                           |
| Dunoon District General                 | N                 | -                                   | -                        | -                    | -                           |
| Falkirk & Sterling Forth valley         | Y                 | N                                   | N                        | Y                    | N                           |

| <b>Cardiac Service name</b>        | <b>Complete data Y/N</b> | <b>Clinical Exercise Physiologists Y/N</b> | <b>Exercise Instructors Y/N</b> | <b>Physiotherapists Y/N</b> | <b>Occupational Therapists Y/N</b> |
|------------------------------------|--------------------------|--------------------------------------------|---------------------------------|-----------------------------|------------------------------------|
| Fife Community (Lynebank hospital) | Y                        | N                                          | Y                               | N                           | N                                  |
| Perth Royal infirmary              | Y                        | N                                          | N                               | Y                           | N                                  |
| NHS Tayside Dundee                 | Y                        | N                                          | N                               | Y                           | N                                  |
| Lorn & Islands, Oban               | Y                        | N                                          | N                               | Y                           | N                                  |
| Belford Hospital fort William      | Y                        | N                                          | N                               | Y                           | N                                  |
| Raigmore, Inverness                | Y                        | N                                          | N                               | Y                           | N                                  |
| Dr Grays hospital, Elgin           | Y                        | N                                          | N                               | Y                           | N                                  |
| Aberdeen royal infirmary           | Y                        | N                                          | Y                               | Y                           | N                                  |
| Caithness Hospital                 | Y                        | N                                          | N                               | Y                           | N                                  |
| Western isles hospital, Stornoway  | Y                        | N                                          | Y                               | Y                           | N                                  |
| The Balfour, Orkney                | Y                        | N                                          | N                               | Y                           | N                                  |
