# Supplementary material for: Clinical exercise provision in the UK: comparison of staff job titles, roles and qualifications across five specialised exercise services
Source: PubMed Central journal article supplement — BMJ Open Sport Exerc Med. 2022 Jan 24;8(1):e001152. doi: 10.1136/bmjsem-2021-001152 (PMC8788312; doi:10.1136/bmjsem-2021-001152), 2022-01-24
Supplement: bmjsem-2021-001152supp004.pdf [file bmjsem-2021-001152supp004.pdf]

Supplementary Table 3: Falls service data

| Falls Service name                                          | Complete data Y/N | Exercise Physiologists Y/N | Exercise Instructors Y/N | Physiotherapists Y/N | Occupational Therapists Y/N |
|-------------------------------------------------------------|-------------------|----------------------------|--------------------------|----------------------|-----------------------------|
| Aintree Hospital                                            | Y                 | N                          | N                        | Y                    | Y                           |
| Barking, Havering & Redbridge NHS Trust (Queens Romford)    | N                 | -                          | -                        | -                    | -                           |
| Barts Health NHS Trust                                      | Y                 | N                          | N                        | Y                    | Y                           |
| Central London community healthcare (Brent)                 | Y                 | N                          | N                        | Y                    | Y                           |
| Central London community healthcare (Hammersmith)           | Y                 | N                          | N                        | Y                    | Y                           |
| Central London community healthcare (Merton)                | Y                 | N                          | N                        | Y                    | Y                           |
| Central London community healthcare (Barnet)                | Y                 | N                          | N                        | Y                    | Y                           |
| Croydon Health NHS Trust (Croydon Hospital)                 | N                 | -                          | -                        | -                    | -                           |
| Epsom & St Helier University Hospitals (St Helier)          | Y                 | N                          | Y                        | Y                    | N                           |
| Guy's & St Thomas NHS trust (St Thomas Hospital)            | Y                 | N                          | N                        | Y                    | Y                           |
| Central and NW London (Hillingdon)                          | Y                 | N                          | Y                        | Y                    | N                           |
| Homerton University NHS Trust                               | N                 | -                          | -                        | -                    | -                           |
| Imperial College Healthcare NHS Trust (Charing Cross)       | Y                 | N                          | N                        | Y                    | Y                           |
| Kings College Hospital (Kings college hospital)             | Y                 | N                          | N                        | Y                    | Y                           |
| Kings College Hospital (Princess Royal university hospital) | Y                 | N                          | N                        | Y                    | Y                           |
| Kingston Hospital NHS Trust (your healthcare)               | N                 | -                          | -                        | -                    | -                           |
| Lewisham & Greenwich NHS Trust (Lewisham hospital)          | Y                 | N                          | Y                        | Y                    | N                           |
| London North West NHS Trust (Northwick park)                | N                 | -                          | -                        | -                    | -                           |
| North Middlesex University NHS Trust                        | N                 | -                          | -                        | -                    | -                           |
| Royal Free London NHS Trust (Royal free hospital)           | N                 | -                          | -                        | -                    | -                           |
| St George's NHS Trust                                       | N                 | -                          | -                        | -                    | -                           |
| University College London NHS hospitals Trust               | N                 | -                          | -                        | -                    | -                           |
| Nottingham healthcare                                       | Y                 | N                          | N                        | Y                    | Y                           |
| Lincolnshire (Lincoln County)                               | N                 | -                          | -                        | -                    | -                           |
| Derby and Burton (Royal Derby)                              | Y                 | N                          | N                        | Y                    | Y                           |

| Falls Service name                             | Complete data Y/N | Exercise Physiologists Y/N | Exercise Instructors Y/N | Physiotherapists Y/N | Occupational Therapists Y/N |
|------------------------------------------------|-------------------|----------------------------|--------------------------|----------------------|-----------------------------|
| Leicestershire county                          | Y                 | N                          | N                        | Y                    | Y                           |
| University hospitals of Leicester              | Y                 | N                          | N                        | Y                    | Y                           |
| Basildon & Brentwood (Brentwood)               | Y                 | N                          | N                        | Y                    | Y                           |
| Basildon & Brentwood (Thurrock)                | Y                 | N                          | N                        | Y                    | Y                           |
| Bedford Hospitals                              | N                 | -                          | -                        | -                    | -                           |
| Cambridge University (Addenbrookes)            | Y                 | N                          | Y                        | Y                    | N                           |
| East and North Hertfordshire (Lister hospital) | Y                 | N                          | N                        | Y                    | Y                           |
| East Suffolk and north Essex (Colchester)      | Y                 | N                          | N                        | Y                    | Y                           |
| James Paget hospital                           | Y                 | N                          | N                        | Y                    | Y                           |
| Norfolk and Norwich                            | N                 | -                          | -                        | -                    | -                           |
| Queen Elizabeth kings Lynn                     | N                 | -                          | -                        | -                    | -                           |
| West Hertfordshire (Watford)                   | Y                 | N                          | N                        | Y                    | Y                           |
| West Suffolk hospital                          | N                 | -                          | -                        | -                    | -                           |
| Dudley group NHS (Russells hall)               | Y                 | N                          | N                        | Y                    | Y                           |
| George Eliot hospital                          | N                 | -                          | -                        | -                    | -                           |
| Sandwell & west Birmingham                     | Y                 | N                          | N                        | Y                    | Y                           |
| Shrewsbury & Telford                           | N                 | -                          | -                        | -                    | -                           |
| South Warwickshire (Warwick)                   | Y                 | N                          | N                        | Y                    | Y                           |
| The Royal Wolverhampton                        | Y                 | N                          | N                        | Y                    | Y                           |
| University hospitals Birmingham                | N                 | -                          | -                        | -                    | -                           |
| Coventry university hospital                   | Y                 | N                          | N                        | Y                    | Y                           |
| Midlands partnership                           | Y                 | N                          | N                        | Y                    | Y                           |
| Worcester Acute (Worcester Royal)              | Y                 | N                          | N                        | Y                    | Y                           |
| Wye valley (Hereford)                          | Y                 | N                          | N                        | Y                    | Y                           |
| Countess of Chester                            | N                 | -                          | -                        | -                    | -                           |
| Mersey care trust                              | N                 | -                          | -                        | -                    | -                           |

| Falls Service name                                                | Complete data Y/N | Exercise Physiologists Y/N | Exercise Instructors Y/N | Physiotherapists Y/N | Occupational Therapists Y/N |
|-------------------------------------------------------------------|-------------------|----------------------------|--------------------------|----------------------|-----------------------------|
| Southport & Ormskirk (Southport & Formby / Lancs & South Cumbria) | N                 | -                          | -                        | -                    | -                           |
| St Helens & Knowsley (Whiston)                                    | Y                 | N                          | N                        | Y                    | N                           |
| Warrington                                                        | Y                 | N                          | N                        | Y                    | Y                           |
| Halton                                                            | Y                 | N                          | N                        | Y                    | Y                           |
| Wirral University (primary care?)                                 | N                 | -                          | -                        | -                    | -                           |
| Blackpool Teaching hospital                                       | Y                 | N                          | N                        | Y                    | Y                           |
| Bolton NHS (Bolton)                                               | Y                 | N                          | N                        | Y                    | N                           |
| East Lancashire                                                   | Y                 | N                          | N                        | Y                    | Y                           |
| Manchester University NHS (SOUTH)                                 | Y                 | N                          | N                        | Y                    | Y                           |
| Manchester University NHS (NORTH)                                 | Y                 | N                          | N                        | Y                    | Y                           |
| Manchester University NHS (CENTRAL)                               | Y                 | N                          | N                        | Y                    | Y                           |
| Pennine Acute (Fairfield)                                         | Y                 | N                          | N                        | Y                    | Y                           |
| Salford Royal                                                     | Y                 | N                          | N                        | Y                    | Y                           |
| Stockport NHS (Stepping hill)                                     | Y                 | N                          | N                        | Y                    | Y                           |
| Tameside & Glossop (Tameside)                                     | Y                 | N                          | N                        | Y                    | N                           |
| Morecambe and Lancaster hospitals                                 | Y                 | N                          | N                        | Y                    | Y                           |
| Wrightington, Wigan & Leigh (Royal Albert Edward)                 | Y                 | N                          | N                        | Y                    | Y                           |
| County Durham and Darlington (5)                                  | N                 | -                          | -                        | -                    | -                           |
| Gateshead health (QE)                                             | Y                 | N                          | N                        | Y                    | Y                           |
| Newcastle upon Tyne (Royal Victoria)                              | Y                 | N                          | N                        | Y                    | N                           |
| North Cumbria (Cumberland)                                        | Y                 | N                          | Y                        | N                    | N                           |
| North Cumbria (W.Cumberland)                                      | N                 | -                          | -                        | -                    | -                           |
| North Tess & Hartlepool                                           | N                 | -                          | -                        | -                    | -                           |
| Northumbria NHS healthcare                                        | Y                 | N                          | N                        | Y                    | Y                           |

| Falls Service name                           | Complete data Y/N | Exercise Physiologists Y/N | Exercise Instructors Y/N | Physiotherapists Y/N | Occupational Therapists Y/N |
|----------------------------------------------|-------------------|----------------------------|--------------------------|----------------------|-----------------------------|
| Sunderland                                   | Y                 | N                          | N                        | Y                    | Y                           |
| South Tyneside                               | Y                 | N                          | N                        | Y                    | Y                           |
| South Tees NHS (James Cook)                  | Y                 | N                          | N                        | Y                    | Y                           |
| Barnsley hospital                            | Y                 | N                          | N                        | Y                    | Y                           |
| Bradford teaching                            | Y                 | N                          | N                        | Y                    | Y                           |
| Calderdale and Huddersfield                  | Y                 | N                          | N                        | Y                    | Y                           |
| Rotherham NHS                                | Y                 | N                          | N                        | Y                    | Y                           |
| Harrogate & District NHS                     | Y                 | N                          | N                        | Y                    | Y                           |
| Hull University                              | Y                 | N                          | N                        | Y                    | Y                           |
| Leeds teaching hospital                      | Y                 | N                          | N                        | Y                    | Y                           |
| Mid Yorkshire hospitals                      | Y                 | N                          | N                        | Y                    | Y                           |
| Northern Lincolnshire and Goole              | Y                 | N                          | N                        | Y                    | Y                           |
| Doncaster and Bassetlaw                      | Y                 | N                          | N                        | Y                    | N                           |
| South West Yorkshire (Sheffield)             | Y                 | N                          | N                        | Y                    | Y                           |
| York teaching hospitals                      | Y                 | N                          | N                        | Y                    | Y                           |
| Brighton and Sussex community healthcare     | Y                 | N                          | N                        | Y                    | Y                           |
| Dartford and Gravesham (Darent valley)       | Y                 | N                          | N                        | Y                    | Y                           |
| West Kent hospitals                          | N                 | -                          | -                        | -                    | -                           |
| East Kent hospitals                          | N                 | -                          | -                        | -                    | -                           |
| East Sussex healthcare (Eastbourne)          | N                 | -                          | -                        | -                    | -                           |
| Maidstone & Tunbridge Wells (TB & Maidstone) | Y                 | N                          | N                        | Y                    | Y                           |
| Medway NHS                                   | Y                 | N                          | N                        | Y                    | Y                           |
| Royal Surrey NHS                             | Y                 | N                          | Y                        | Y                    | N                           |
| Gloucester hospitals (Royal)                 | Y                 | N                          | N                        | Y                    | Y                           |
| Great Western hospitals (Swindon)            | Y                 | N                          | N                        | Y                    | Y                           |

| Falls Service name                            | Complete data Y/N | Exercise Physiologists Y/N | Exercise Instructors Y/N | Physiotherapists Y/N | Occupational Therapists Y/N |
|-----------------------------------------------|-------------------|----------------------------|--------------------------|----------------------|-----------------------------|
| North Bristol hospitals                       | Y                 | N                          | N                        | Y                    | Y                           |
| Northern Devon Healthcare                     | Y                 | N                          | N                        | Y                    | Y                           |
| Royal Cornwall                                | Y                 | N                          | N                        | Y                    | Y                           |
| Royal Devon and Exeter                        | Y                 | N                          | N                        | Y                    | Y                           |
| Royal hospital Bath                           | Y                 | N                          | N                        | Y                    | Y                           |
| Torbay and South Devon                        | Y                 | N                          | Y                        | Y                    | N                           |
| University hospitals Plymouth (Derriford)     | Y                 | N                          | N                        | Y                    | Y                           |
| Yeovil district hospital                      | Y                 | N                          | N                        | Y                    | Y                           |
| Buckinghamshire healthcare (Wycombe)          | N                 | -                          | -                        | -                    | -                           |
| Oxford university hospitals                   | Y                 | N                          | N                        | Y                    | Y                           |
| Royal Berkshire hospital                      | Y                 | N                          | N                        | Y                    | Y                           |
| Bridport hospital Dorest healthcare           | Y                 | N                          | N                        | Y                    | Y                           |
| Portsmouth hospitals (QA)                     | Y                 | N                          | N                        | Y                    | Y                           |
| Royal Bournemouth hospital                    | Y                 | N                          | N                        | Y                    | Y                           |
| Solent NHS trust (Southampton)                | Y                 | N                          | N                        | Y                    | N                           |
| Belfast health & Social care (Royal Victoria) | N                 | -                          | -                        | -                    | -                           |
| Northern health & social care                 | Y                 | N                          | N                        | Y                    | Y                           |
| South eastern health & social care            | N                 | -                          | -                        | -                    | -                           |
| Southern health & social care                 | Y                 | N                          | N                        | Y                    | Y                           |
| Western health & social care                  | Y                 | N                          | N                        | Y                    | Y                           |
| Dumfries & Galloway Cluden                    | Y                 | N                          | N                        | Y                    | Y                           |
| Borders general hospital Melrose              | Y                 | N                          | N                        | Y                    | Y                           |
| Ayrshire & Arran (Ayr Hospital)               | Y                 | N                          | N                        | Y                    | Y                           |
| South Lanarkshire                             | Y                 | N                          | N                        | Y                    | Y                           |
| Glasgow & Clyde (South Glasgow)               | Y                 | N                          | N                        | Y                    | Y                           |
| NHS Lothian                                   | Y                 | N                          | N                        | Y                    | Y                           |

| Falls Service name                             | Complete data Y/N | Exercise Physiologists Y/N | Exercise Instructors Y/N | Physiotherapists Y/N | Occupational Therapists Y/N |
|------------------------------------------------|-------------------|----------------------------|--------------------------|----------------------|-----------------------------|
| Falkirk & Sterling Forth valley                | Y                 | N                          | N                        | Y                    | Y                           |
| NHS Tayside Dundee                             | Y                 | N                          | N                        | Y                    | Y                           |
| Lorn & Islands, Oban                           | Y                 | N                          | N                        | Y                    | Y                           |
| Aberdeen royal infirmary                       | Y                 | N                          | N                        | Y                    | Y                           |
| Aneurin Bevan university health board (County) | Y                 | N                          | Y                        | N                    | N                           |
| Aneurin Bevan university health board (Nevill) | Y                 | N                          | Y                        | N                    | N                           |
| Aneurin Bevan university health board (St. w)  | Y                 | N                          | Y                        | N                    | N                           |
| Aneurin Bevan university health board (Ysbyty) | Y                 | N                          | Y                        | N                    | N                           |
| Betsi Cadwaladr (NW Cardiac rehab)             | Y                 | N                          | Y                        | N                    | N                           |
| Betsi Cadwaladr (Wrexham)                      | Y                 | N                          | Y                        | N                    | N                           |
| Betsi Cadwaladr (Llandudno & Ysbyty)           | Y                 | N                          | Y                        | N                    | N                           |
| Cardiff & Vale university health board         | Y                 | N                          | Y                        | N                    | N                           |
| Cwm Taf (Prince of Wales Hospital)             | Y                 | N                          | Y                        | N                    | N                           |
| Cwm Taf (Glam & Charles)                       | Y                 | N                          | Y                        | N                    | N                           |
| Hywel Dda University HB (Bronglais)            | Y                 | N                          | Y                        | N                    | N                           |
| Hywel Dda University HB (Glang)                | Y                 | N                          | Y                        | N                    | N                           |
| Hywel Dda University HB (Haverfordwest)        | Y                 | N                          | Y                        | N                    | N                           |
| Powys Teaching HB (Rhayadar)                   | Y                 | N                          | Y                        | N                    | N                           |
| powys Teaching HB (Brecon War mem)             | Y                 | N                          | Y                        | N                    | N                           |
| Swansea Bay HB (Morrision & Singleton)         | Y                 | N                          | Y                        | N                    | N                           |
| Swansea Bay HB (Neath & PT)                    | Y                 | N                          | Y                        | N                    | N                           |
