# Supplementary material for: Clinical exercise provision in the UK: comparison of staff job titles, roles and qualifications across five specialised exercise services
Source: PubMed Central journal article supplement — BMJ Open Sport Exerc Med. 2022 Jan 24;8(1):e001152. doi: 10.1136/bmjsem-2021-001152 (PMC8788312; doi:10.1136/bmjsem-2021-001152), 2022-01-24
Supplement: bmjsem-2021-001152supp005.pdf [file bmjsem-2021-001152supp005.pdf]

Supplementary Table 4: Pulmonary service data

| <b>Pulmonary Service name</b>                                     | <b>Complete data Y/N</b> | <b>Exercise Physiologists Y/N</b> | <b>Exercise Instructors Y/N</b> | <b>Physiotherapists Y/N</b> | <b>Occupational Therapists Y/N</b> |
|-------------------------------------------------------------------|--------------------------|-----------------------------------|---------------------------------|-----------------------------|------------------------------------|
| Airedale NHS Foundation Trust                                     | Y                        | N                                 | N                               | Y                           | N                                  |
| Aneurin Bevan University LHB (Newport)                            | Y                        | N                                 | Y                               | Y                           | N                                  |
| Aneurin Bevan University LHB (ysbyty)                             | Y                        | N                                 | Y                               | Y                           | N                                  |
| Anglian Community Enterprise Community Interest Company (ACE CIC) | Y                        | N                                 | Y                               | N                           | N                                  |
| Atrium Health Ltd (Coventry & Warwickshire NHS)                   | Y                        | Y                                 | N                               | N                           | N                                  |
| Barnet, Enfield and Haringey Mental Health NHS Trust              | Y                        | N                                 | N                               | Y                           | N                                  |
| Barts Health NHS Trust (Tower Hamlets)                            | N                        | -                                 | -                               | -                           | -                                  |
| Bedford Hospital NHS Trust (Bedford Hospital)                     | Y                        | N                                 | N                               | Y                           | N                                  |
| Berkshire Healthcare NHS Foundation Trust                         | Y                        | N                                 | N                               | Y                           | N                                  |
| Betsi Cadwaladr University LHB                                    | Y                        | Y                                 | N                               | N                           | N                                  |
| Betsi Cadwaladr University LHB                                    | Y                        | N                                 | N                               | Y                           | N                                  |
| Betsi Cadwaladr University LHB                                    | Y                        | N                                 | N                               | Y                           | N                                  |
| Birmingham Community Healthcare NHS Foundation Trust              | Y                        | N                                 | N                               | Y                           | N                                  |
| BOC LTD - Blackpool Teaching Hospitals NHS Foundation Trust       | Y                        | N                                 | N                               | Y                           | N                                  |
| Blackpool Flyde & Wyre                                            | Y                        | N                                 | Y                               | Y                           | N                                  |
| BOC LTD – Bradford                                                | Y                        | N                                 | N                               | Y                           | N                                  |
| BOC LTD - East Staffordshire                                      | Y                        | N                                 | N                               | Y                           | N                                  |
| BOC LTD - Hounslow community                                      | Y                        | N                                 | N                               | Y                           | N                                  |
| BOC LTD - Newcastle Gateshead healthy lungs                       | Y                        | N                                 | N                               | Y                           | N                                  |
| BOC LTD - North east Hampshire & Fareham                          | Y                        | N                                 | N                               | Y                           | N                                  |
| BOC LTD - Nottingham West                                         | Y                        | N                                 | N                               | Y                           | N                                  |
| BOC LTD - Somerset                                                | Y                        | N                                 | N                               | Y                           | N                                  |
| BOC LTD - South East staffs                                       | Y                        | N                                 | N                               | Y                           | N                                  |
| BOC LTD - North Lincolnshire                                      | Y                        | N                                 | N                               | Y                           | N                                  |

| <b>Pulmonary Service name</b>                                    | <b>Complete data Y/N</b> | <b>Exercise Physiologists Y/N</b> | <b>Exercise Instructors Y/N</b> | <b>Physiotherapists Y/N</b> | <b>Occupational Therapists Y/N</b> |
|------------------------------------------------------------------|--------------------------|-----------------------------------|---------------------------------|-----------------------------|------------------------------------|
| BOC LTD - West Norfolk                                           | Y                        | N                                 | N                               | Y                           | N                                  |
| Bolton NHS Foundation Trust                                      | Y                        | N                                 | N                               | Y                           | N                                  |
| Bristol Community Health                                         | Y                        | N                                 | Y                               | Y                           | N                                  |
| Bromley Healthcare                                               | Y                        | N                                 | N                               | Y                           | N                                  |
| Buckinghamshire Healthcare NHS Trust                             | Y                        | N                                 | N                               | Y                           | N                                  |
| Calderdale and Huddersfield NHS Foundation Trust                 | Y                        | N                                 | N                               | Y                           | N                                  |
| Cambridgeshire and Peterborough NHS Foundation Trust             | Y                        | N                                 | N                               | Y                           | N                                  |
| Cardiff & Vale University LHB                                    | Y                        | N                                 | Y                               | Y                           | N                                  |
| Care Plus Group                                                  | Y                        | N                                 | N                               | Y                           | Y                                  |
| Central and North West London NHS Foundation Trust (camden)      | Y                        | N                                 | N                               | Y                           | N                                  |
| Central and North West London NHS Foundation Trust (MK)          | Y                        | N                                 | Y                               | N                           | N                                  |
| Central London Community Healthcare NHS Trust (Barnet)           | Y                        | N                                 | N                               | Y                           | N                                  |
| Central London Community Healthcare NHS Trust (Harrow)           | N                        | -                                 | -                               | -                           | -                                  |
| Central London Community Healthcare NHS Trust (Merton)           | Y                        | N                                 | N                               | Y                           | N                                  |
| Central London Community Healthcare NHS Trust (W. Herts)         | Y                        | N                                 | N                               | Y                           | N                                  |
| Cheshire and Wirral Partnership NHS Foundation Trust             | N                        | -                                 | -                               | -                           | -                                  |
| City Health Care Partnership CIC (East Riding)                   | Y                        | N                                 | Y                               | N                           | N                                  |
| City Health Care Partnership CIC (Hull)                          | Y                        | N                                 | Y                               | N                           | N                                  |
| Cornwall Partnership NHS Foundation Trust (East)                 | Y                        | N                                 | N                               | Y                           | N                                  |
| Cornwall Partnership NHS Foundation Trust (Mid / West / North)   | Y                        | N                                 | N                               | Y                           | N                                  |
| County Durham and Darlington NHS Foundation Trust (Darl)         | Y                        | N                                 | N                               | Y                           | Y                                  |
| County Durham and Darlington NHS Foundation Trust (Dales)        | Y                        | N                                 | N                               | Y                           | Y                                  |
| County Durham and Darlington NHS Foundation Trust (North Durham) | Y                        | N                                 | N                               | Y                           | Y                                  |
| CSH Surrey                                                       | Y                        | N                                 | N                               | Y                           | Y                                  |
| Cwm Taf Morgannwg University Local Health Board                  | Y                        | N                                 | Y                               | Y                           | N                                  |
| Derbyshire Community Health Services NHS Foundation Trust        | Y                        | N                                 | N                               | Y                           | N                                  |

| <b>Pulmonary Service name</b>                                   | <b>Complete data Y/N</b> | <b>Exercise Physiologists Y/N</b> | <b>Exercise Instructors Y/N</b> | <b>Physiotherapists Y/N</b> | <b>Occupational Therapists Y/N</b> |
|-----------------------------------------------------------------|--------------------------|-----------------------------------|---------------------------------|-----------------------------|------------------------------------|
| Doncaster And Bassetlaw Teaching Hospitals NHS Foundation Trust | Y                        | N                                 | N                               | Y                           | N                                  |
| Dorset County Hospital NHS Foundation Trust                     | Y                        | N                                 | N                               | Y                           | N                                  |
| Dorset Healthcare University NHS Foundation Trust               | Y                        | N                                 | N                               | Y                           | Y                                  |
| East Cheshire NHS Trust                                         | Y                        | N                                 | N                               | Y                           | N                                  |
| East Lancashire Hospitals NHS Trust                             | Y                        | N                                 | N                               | Y                           | N                                  |
| East Suffolk and North Essex NHS Foundation Trust               | Y                        | N                                 | Y                               | Y                           | N                                  |
| East Sussex Healthcare NHS Trust                                | Y                        | N                                 | N                               | Y                           | N                                  |
| Epsom and St Helier University Hospitals NHS Trust              | Y                        | N                                 | N                               | Y                           | N                                  |
| Essex Partnership University NHS Foundation Trust               | N                        | -                                 | -                               | -                           | -                                  |
| First Community Health and Care CIC                             | Y                        | N                                 | N                               | Y                           | N                                  |
| Frimley Health NHS Foundation Trust                             | Y                        | N                                 | N                               | Y                           | Y                                  |
| Gateshead Health NHS Foundation Trust                           | N                        | -                                 | -                               | -                           | -                                  |
| George Eliot Hospital NHS Trust                                 | Y                        | N                                 | N                               | Y                           | N                                  |
| Gloucestershire Care Services NHS Trust                         | Y                        | N                                 | N                               | Y                           | Y                                  |
| Guy's and St Thomas' NHS Foundation Trust                       | Y                        | N                                 | N                               | Y                           | Y                                  |
| Harrogate and District NHS Foundation Trust                     | Y                        | N                                 | N                               | Y                           | Y                                  |
| Hertfordshire Community NHS Trust                               | Y                        | N                                 | Y                               | Y                           | N                                  |
| Homerton University Hospital NHS Foundation Trust               | Y                        | N                                 | N                               | Y                           | Y                                  |
| Richmond Community Healthcare NHS Trust - Hannah Brown          | N                        | -                                 | -                               | -                           | -                                  |
| Hywel Dda University LHB (Carmarthenshire)                      | Y                        | N                                 | Y                               | Y                           | N                                  |
| Hywel Dda University LHB (Pembrokeshire)                        | Y                        | N                                 | Y                               | Y                           | N                                  |
| Imperial College Healthcare NHS Trust (Central / West)          | Y                        | N                                 | Y                               | Y                           | N                                  |
| Imperial College Healthcare NHS Trust                           | Y                        | N                                 | Y                               | Y                           | N                                  |
| Isle of Wight NHS Trust                                         | Y                        | N                                 | N                               | Y                           | N                                  |
| James Paget University Hospitals NHS Foundation Trust           | Y                        | N                                 | N                               | Y                           | N                                  |
| Kent Community Health NHS Foundation Trust                      | Y                        | N                                 | N                               | Y                           | Y                                  |

| <b>Pulmonary Service name</b>                                        | <b>Complete data Y/N</b> | <b>Exercise Physiologists Y/N</b> | <b>Exercise Instructors Y/N</b> | <b>Physiotherapists Y/N</b> | <b>Occupational Therapists Y/N</b> |
|----------------------------------------------------------------------|--------------------------|-----------------------------------|---------------------------------|-----------------------------|------------------------------------|
| Kettering General Hospital NHS Foundation Trust                      | N                        | -                                 | -                               | -                           | -                                  |
| King's College Hospital NHS Foundation Trust                         | Y                        | N                                 | Y                               | Y                           | N                                  |
| Lancashire & South Cumbria NHS Foundation Trust (Blackburn / Darwin) | Y                        | N                                 | Y                               | Y                           | N                                  |
| Lancashire & South Cumbria NHS Foundation Trust (Central Lancs)      | Y                        | N                                 | Y                               | Y                           | N                                  |
| Leeds Community Healthcare NHS Trust                                 | N                        | -                                 | -                               | -                           | -                                  |
| Leicestershire Partnership NHS Trust                                 | Y                        | N                                 | N                               | Y                           | Y                                  |
| Lewisham and Greenwich NHS Trust                                     | N                        | -                                 | -                               | -                           | -                                  |
| Lincolnshire Community Health Services NHS Trust                     | N                        | -                                 | -                               | -                           | -                                  |
| Liverpool Heart and Chest Hospital NHS Foundation Trust (Know)       | Y                        | Y                                 | N                               | N                           | N                                  |
| Liverpool Heart And Chest Hospital NHS Foundation Trust (breathe)    | Y                        | Y                                 | N                               | N                           | N                                  |
| Liverpool University Hospitals NHS Foundation Trust (aintree)        | Y                        | Y                                 | N                               | N                           | N                                  |
| Livewell Southwest                                                   | Y                        | Y                                 | N                               | N                           | N                                  |
| Locala Community Partnerships CIC                                    | N                        | -                                 | -                               | -                           | -                                  |
| London North West University Healthcare NHS Trust (Brent)            | Y                        | N                                 | N                               | Y                           | N                                  |
| London North West University Healthcare NHS Trust (Ealing)           | Y                        | N                                 | N                               | Y                           | N                                  |
| Luton and Dunstable University Hospital NHS Foundation Trust (Cams)  | Y                        | N                                 | N                               | Y                           | N                                  |
| Maidstone and Tunbridge Wells NHS Trust                              | Y                        | N                                 | N                               | Y                           | N                                  |
| Manchester University NHS Foundation Trust (Comm)                    | Y                        | N                                 | N                               | Y                           | N                                  |
| Medway Community Healthcare                                          | N                        | -                                 | -                               | -                           | -                                  |
| Mersey Care NHS Foundation Trust                                     | Y                        | N                                 | N                               | Y                           | N                                  |
| Mid Cheshire Hospitals NHS Foundation Trust                          | N                        | -                                 | -                               | -                           | -                                  |
| Mid Yorkshire Hospitals NHS Trust (therapies)                        | Y                        | N                                 | N                               | Y                           | N                                  |
| Mid Yorkshire Hospitals NHS Trust (N.Kirklees)                       | Y                        | N                                 | N                               | Y                           | N                                  |

| <b>Pulmonary Service name</b>                                      | <b>Complete data Y/N</b> | <b>Exercise Physiologists Y/N</b> | <b>Exercise Instructors Y/N</b> | <b>Physiotherapists Y/N</b> | <b>Occupational Therapists Y/N</b> |
|--------------------------------------------------------------------|--------------------------|-----------------------------------|---------------------------------|-----------------------------|------------------------------------|
| Midlands Partnership NHS Foundation Trust (North Staffs)           | Y                        | Y                                 | N                               | N                           | N                                  |
| NHS Dumfries and Galloway                                          | Y                        | N                                 | N                               | Y                           | N                                  |
| NHS Forth Valley                                                   | Y                        | N                                 | N                               | Y                           | N                                  |
| NHS Grampian (Aberdeen City)                                       | Y                        | N                                 | N                               | Y                           | N                                  |
| NHS Grampian (Aberdeenshire)                                       | Y                        | N                                 | N                               | Y                           | N                                  |
| NHS Greater Glasgow, Clyde                                         | Y                        | N                                 | N                               | Y                           | N                                  |
| NHS Highland (East Caithness)                                      | Y                        | N                                 | N                               | Y                           | N                                  |
| NHS Highland (Lochaber)                                            | Y                        | N                                 | N                               | Y                           | N                                  |
| NHS Highland (Raigmore)                                            | Y                        | N                                 | N                               | Y                           | N                                  |
| NHS Lanarkshire                                                    | Y                        | N                                 | N                               | Y                           | N                                  |
| NHS Lothian                                                        | Y                        | N                                 | N                               | Y                           | Y                                  |
| NHS Tayside                                                        | Y                        | N                                 | N                               | Y                           | N                                  |
| Norfolk and Norwich University Hospitals NHS Foundation Trust      | N                        | -                                 | -                               | -                           | -                                  |
| Norfolk Community Health and Care NHS Trust                        | Y                        | N                                 | Y                               | N                           | N                                  |
| North Bristol NHS Trust                                            | Y                        | N                                 | N                               | Y                           | Y                                  |
| North Cumbria Integrated Care NHS Foundation Trust (Carlisle Comm) | N                        | -                                 | -                               | -                           | -                                  |
| North Cumbria Integrated Care NHS Foundation Trust (N Cumbria hos) | N                        | -                                 | -                               | -                           | -                                  |
| North Cumbria Integrated Care NHS Foundation Trust (Solway comm)   | N                        | -                                 | -                               | -                           | -                                  |
| North Cumbria Integrated Care NHS Foundation Trust (West Cumbria)  | N                        | -                                 | -                               | -                           | -                                  |
| North East London NHS Foundation Trust (Havering)                  | Y                        | N                                 | N                               | Y                           | N                                  |
| North East London NHS Foundation Trust (Basildon)                  | N                        | -                                 | -                               | -                           | -                                  |
| North East London NHS Foundation Trust (Redbridge)                 | Y                        | N                                 | N                               | Y                           | N                                  |
| North East London NHS Foundation Trust (Barking)                   | Y                        | N                                 | N                               | Y                           | N                                  |
| North East London NHS Foundation Trust (Waltham forest)            | Y                        | N                                 | N                               | Y                           | N                                  |

| <b>Pulmonary Service name</b>                                   | <b>Complete data Y/N</b> | <b>Exercise Physiologists Y/N</b> | <b>Exercise Instructors Y/N</b> | <b>Physiotherapists Y/N</b> | <b>Occupational Therapists Y/N</b> |
|-----------------------------------------------------------------|--------------------------|-----------------------------------|---------------------------------|-----------------------------|------------------------------------|
| North Somerset Community Partnership Community Interest Company | N                        | -                                 | -                               | -                           | -                                  |
| North Tees and Hartlepool NHS Foundation Trust                  | N                        | -                                 | -                               | -                           | -                                  |
| North West Anglia NHS Foundation Trust                          | Y                        | N                                 | N                               | Y                           | N                                  |
| North West Boroughs Healthcare NHS Foundation Trust             | Y                        | N                                 | Y                               | Y                           | N                                  |
| Northampton General Hospital NHS Trust                          | Y                        | N                                 | Y                               | Y                           | N                                  |
| Northern Devon Healthcare NHS Trust                             | Y                        | N                                 | N                               | Y                           | N                                  |
| Northumbria Healthcare NHS Foundation Trust                     | N                        | -                                 | -                               | -                           | -                                  |
| Nottingham Citycare Partnership                                 | Y                        | N                                 | N                               | Y                           | N                                  |
| Nottinghamshire Healthcare NHS Foundation Trust (Bassetlaw)     | N                        | -                                 | -                               | -                           | -                                  |
| Nottinghamshire Healthcare NHS Foundation Trust (Mansfield)     | N                        | -                                 | -                               | -                           | -                                  |
| Nottinghamshire Healthcare NHS Foundation Trust (Newark)        | N                        | -                                 | -                               | -                           | -                                  |
| Nottinghamshire Healthcare NHS Foundation Trust (North)         | N                        | -                                 | -                               | -                           | -                                  |
| Nottinghamshire Healthcare NHS Foundation Trust (Rushcliffe)    | N                        | -                                 | -                               | -                           | -                                  |
| Oxford Health NHS Foundation Trust                              | Y                        | N                                 | N                               | Y                           | N                                  |
| Oxleas NHS Foundation Trust                                     | Y                        | N                                 | Y                               | Y                           | N                                  |
| Pennine Acute Hospitals NHS Trust (Fairfield)                   | Y                        | N                                 | Y                               | Y                           | N                                  |
| Pennine Care NHS Foundation Trust (Trafford)                    | Y                        | N                                 | Y                               | Y                           | N                                  |
| Powys Teaching LHB                                              | Y                        | N                                 | N                               | Y                           | N                                  |
| Provide (Cambs)                                                 | Y                        | N                                 | N                               | Y                           | N                                  |
| Provide (Mid Essex)                                             | Y                        | N                                 | N                               | Y                           | N                                  |
| Respicare Limited (Bexley)                                      | Y                        | N                                 | N                               | Y                           | N                                  |
| Respicare Limited (Swale)                                       | Y                        | N                                 | N                               | Y                           | N                                  |
| Royal Berkshire NHS Foundation Trust                            | Y                        | N                                 | N                               | Y                           | N                                  |
| Royal Brompton & Harefield NHS Foundation Trust (Harefield)     | Y                        | N                                 | N                               | Y                           | Y                                  |
| Royal Brompton & Harefield NHS Foundation Trust (RB)            | Y                        | N                                 | N                               | Y                           | Y                                  |
| Royal Devon and Exeter NHS Foundation Trust                     | N                        | -                                 | -                               | -                           | -                                  |

| <b>Pulmonary Service name</b>                             | <b>Complete data Y/N</b> | <b>Exercise Physiologists Y/N</b> | <b>Exercise Instructors Y/N</b> | <b>Physiotherapists Y/N</b> | <b>Occupational Therapists Y/N</b> |
|-----------------------------------------------------------|--------------------------|-----------------------------------|---------------------------------|-----------------------------|------------------------------------|
| Royal Surrey County Hospital NHS Foundation Trust         | Y                        | N                                 | Y                               | Y                           | N                                  |
| Salford Royal NHS Foundation Trust                        | Y                        | N                                 | Y                               | Y                           | N                                  |
| Salisbury NHS Foundation Trust                            | Y                        | N                                 | N                               | Y                           | N                                  |
| Sandwell and West Birmingham Hospitals NHS Trust          | Y                        | N                                 | N                               | Y                           | Y                                  |
| Sheffield Teaching Hospitals NHS Foundation Trust         | Y                        | N                                 | N                               | Y                           | N                                  |
| Shropshire Community Health NHS Trust                     | Y                        | N                                 | N                               | Y                           | N                                  |
| Sirona Care & Health                                      | N                        | -                                 | -                               | -                           | -                                  |
| Solent NHS Trust (Hampshire & portsmouth)                 | N                        | -                                 | -                               | -                           | -                                  |
| South Tees Hospitals NHS Foundation Trust                 | Y                        | N                                 | N                               | Y                           | N                                  |
| South Tyneside and Sunderland NHS Foundation Trust        | Y                        | N                                 | Y                               | N                           | N                                  |
| South Tyneside and Sunderland NHS Foundation Trust        | Y                        | N                                 | Y                               | N                           | N                                  |
| South Warwickshire NHS Foundation Trust                   | Y                        | Y                                 | N                               | N                           | N                                  |
| South West Yorkshire Partnership NHS Foundation Trust     | Y                        | N                                 | Y                               | Y                           | N                                  |
| Southend University Hospital NHS Foundation Trust         | N                        | -                                 | -                               | -                           | -                                  |
| Southern Health NHS Foundation Trust                      | Y                        | N                                 | N                               | Y                           | N                                  |
| Southport and Ormskirk Hospital NHS Trust                 | Y                        | N                                 | N                               | Y                           | N                                  |
| St George's University Hospitals NHS Foundation Trust     | Y                        | N                                 | N                               | Y                           | N                                  |
| Stockport NHS Foundation Trust                            | Y                        | N                                 | N                               | Y                           | N                                  |
| Sussex Community NHS Foundation Trust (Horsham)           | Y                        | N                                 | Y                               | Y                           | N                                  |
| Sussex Community NHS Foundation Trust (Brighton)          | Y                        | N                                 | Y                               | Y                           | N                                  |
| Swansea Bay Local Health Board                            | N                        | -                                 | -                               | -                           | -                                  |
| Swindon Borough Council (Unitary)                         | N                        | -                                 | -                               | -                           | -                                  |
| Tameside and Glossop Integrated Care NHS Foundation Trust | N                        | -                                 | -                               | -                           | -                                  |
| The Dudley Group NHS Foundation Trust                     | Y                        | N                                 | N                               | Y                           | N                                  |
| The Newcastle Upon Tyne Hospitals NHS Foundation Trust    | Y                        | N                                 | N                               | Y                           | N                                  |
| The Rotherham NHS Foundation Trust                        | N                        | -                                 | -                               | -                           | -                                  |

| <b>Pulmonary Service name</b>                                         | <b>Complete data Y/N</b> | <b>Exercise Physiologists Y/N</b> | <b>Exercise Instructors Y/N</b> | <b>Physiotherapists Y/N</b> | <b>Occupational Therapists Y/N</b> |
|-----------------------------------------------------------------------|--------------------------|-----------------------------------|---------------------------------|-----------------------------|------------------------------------|
| The Royal Bournemouth And Christchurch Hospitals NHS Foundation Trust | N                        | -                                 | -                               | -                           | -                                  |
| The Royal Marsden NHS Foundation Trust                                | Y                        | N                                 | N                               | Y                           | N                                  |
| The Royal Wolverhampton NHS Trust                                     | N                        | -                                 | -                               | -                           | -                                  |
| Torbay and South Devon NHS Foundation Trust                           | Y                        | N                                 | Y                               | Y                           | N                                  |
| University Hospital Southampton NHS Foundation Trust                  | Y                        | N                                 | N                               | Y                           | N                                  |
| University Hospitals Birmingham NHS Foundation Trust                  | Y                        | N                                 | N                               | Y                           | N                                  |
| University Hospitals of Derby and Burton NHS Foundation Trust         | Y                        | N                                 | Y                               | Y                           | N                                  |
| University Hospitals of Morecambe Bay NHs Foundation Trust            | Y                        | N                                 | N                               | Y                           | N                                  |
| Virgin Care Ltd                                                       | Y                        | N                                 | N                               | Y                           | N                                  |
| Walsall Healthcare NHS Trust                                          | Y                        | Y                                 | N                               | N                           | N                                  |
| Warrington and Halton Hospitals NHS Foundation Trust                  | Y                        | N                                 | N                               | Y                           | N                                  |
| West Suffolk NHS Foundation Trust                                     | Y                        | N                                 | N                               | Y                           | N                                  |
| Western Sussex Hospitals NHS Foundation Trust                         | Y                        | N                                 | N                               | Y                           | N                                  |
| Whittington Health NHS Trust                                          | N                        | -                                 | -                               | -                           | -                                  |
| Wiltshire Health & Care                                               | N                        | -                                 | -                               | -                           | -                                  |
| Wirral University Teaching Hospital NHS Foundation Trust              | Y                        | Y                                 | N                               | N                           | N                                  |
| Worcestershire Acute Hospitals NHS Trust                              | Y                        | N                                 | Y                               | N                           | N                                  |
| Wrightington, Wigan and Leigh NHS Foundation Trust                    | N                        | -                                 | -                               | -                           | -                                  |
| Wye Valley NHS Trust                                                  | Y                        | N                                 | Y                               | N                           | N                                  |
| York Teaching Hospital NHS Foundation Trust                           | Y                        | N                                 | N                               | Y                           | N                                  |
| Your Healthcare                                                       | Y                        | N                                 | N                               | Y                           | Y                                  |
| Northern health & social care (Antrim)                                | Y                        | N                                 | Y                               | Y                           | N                                  |
| South Eastern Health & social care (Ulster - 3?)                      | Y                        | N                                 | N                               | Y                           | N                                  |
| Southern health & social care (craigavon)                             | Y                        | N                                 | N                               | Y                           | N                                  |
| Western health & social care (altna)                                  | Y                        | N                                 | N                               | Y                           | Y                                  |



| <b>Pulmonary Service name</b>         | <b>Complete data Y/N</b> | <b>Exercise Physiologists Y/N</b> | <b>Exercise Instructors Y/N</b> | <b>Physiotherapists Y/N</b> | <b>Occupational Therapists Y/N</b> |
|---------------------------------------|--------------------------|-----------------------------------|---------------------------------|-----------------------------|------------------------------------|
| Western health & social care (Omagh)  | Y                        | N                                 | N                               | Y                           | Y                                  |
| Princes Elizabeth Hospital (Guernsey) | Y                        | Y                                 | N                               | N                           | N                                  |
