# Supplementary material for: Clinical exercise provision in the UK: comparison of staff job titles, roles and qualifications across five specialised exercise services
Source: PubMed Central journal article supplement — BMJ Open Sport Exerc Med. 2022 Jan 24;8(1):e001152. doi: 10.1136/bmjsem-2021-001152 (PMC8788312; doi:10.1136/bmjsem-2021-001152), 2022-01-24
Supplement: bmjsem-2021-001152supp006.pdf [file bmjsem-2021-001152supp006.pdf]

Supplementary Table 5: Stroke service data

| Stroke Service name                                         | Complete data Y/N | Clinical Exercise Physiologists Y/N | Exercise Instructors Y/N | Physiotherapists Y/N | Occupational Therapists Y/N |
|-------------------------------------------------------------|-------------------|-------------------------------------|--------------------------|----------------------|-----------------------------|
| Barking, Havering & Redbridge NHS Trust (Queens Romford)    | Y                 | N                                   | N                        | Y                    | Y                           |
| Barts Health NHS Trust (Newham University)                  | Y                 | N                                   | N                        | Y                    | Y                           |
| Barts Health NHS Trust (Whipps Cross)                       | Y                 | N                                   | N                        | Y                    | Y                           |
| Barts Health NHS Trust (Mile End)                           | Y                 | N                                   | N                        | Y                    | Y                           |
| Barts Health NHS Trust (Royal London)                       | Y                 | N                                   | N                        | Y                    | Y                           |
| Chelsea & Westminster Hospital NHS Trust                    | Y                 | N                                   | N                        | Y                    | Y                           |
| Chelsea & Westminster Hospital NHS Trust (W. middle)        | Y                 | N                                   | N                        | Y                    | Y                           |
| Croydon Health NHS Trust (Croydon Hospital)                 | Y                 | N                                   | N                        | Y                    | Y                           |
| Epsom & St Helier University Hospitals (St Helier)          | Y                 | N                                   | N                        | Y                    | Y                           |
| Guy's & St Thomas NHS trust (St Thomas Hospital)            | Y                 | N                                   | N                        | Y                    | Y                           |
| Hillingdon Hospital NHS Trust (Hillingdon)                  | Y                 | N                                   | N                        | Y                    | Y                           |
| Homerton University NHS Trust                               | N                 | -                                   | -                        | -                    | -                           |
| Imperial College Healthcare NHS Trust (Charing Cross)       | Y                 | N                                   | N                        | Y                    | Y                           |
| Kings College Hospital (Kings college hospital)             | Y                 | N                                   | N                        | Y                    | Y                           |
| Kings College Hospital (Princess Royal university hospital) | Y                 | N                                   | N                        | Y                    | Y                           |
| Kingston Hospital NHS Trust                                 | N                 | -                                   | -                        | -                    | -                           |
| Lewisham & Greenwich NHS Trust (Lewisham hospital)          | Y                 | N                                   | N                        | Y                    | Y                           |
| London North West NHS Trust (Northwick park)                | Y                 | N                                   | N                        | Y                    | Y                           |
| North Middlesex University NHS Trust                        | Y                 | N                                   | N                        | Y                    | Y                           |
| Royal Free London NHS Trust (Royal free hospital)           | N                 | -                                   | -                        | -                    | -                           |
| Royal Free London NHS Trust (Barnet General)                | N                 | -                                   | -                        | -                    | -                           |
| St George's NHS Trust                                       | N                 | -                                   | -                        | -                    | -                           |
| University College London NHS hospitals Trust               | N                 | -                                   | -                        | -                    | -                           |

| Stroke Service name                                | Complete data Y/N | Clinical Exercise Physiologists Y/N | Exercise Instructors Y/N | Physiotherapists Y/N | Occupational Therapists Y/N |
|----------------------------------------------------|-------------------|-------------------------------------|--------------------------|----------------------|-----------------------------|
| Nottingham general hospital                        | Y                 | N                                   | N                        | Y                    | Y                           |
| Nottingham University Hospital (City)              | Y                 | N                                   | N                        | Y                    | Y                           |
| Sherwood Forest (Kings Mill)                       | N                 | -                                   | -                        | -                    | -                           |
| Lincolnshire (Pilgrim)                             | Y                 | N                                   | N                        | Y                    | Y                           |
| Lincolnshire (Lincoln County)                      | Y                 | N                                   | N                        | Y                    | Y                           |
| Derby and Burton (Royal Derby)                     | N                 | -                                   | -                        | -                    | -                           |
| University hospitals of Leicester (Royal)          | N                 | -                                   | -                        | -                    | -                           |
| Basildon & Thurrock (Basildon University)          | N                 | -                                   | -                        | -                    | -                           |
| Bedford Hospitals                                  | Y                 | N                                   | N                        | Y                    | Y                           |
| Cambridge University (Addenbrookes)                | Y                 | N                                   | N                        | Y                    | Y                           |
| East and North Hertfordshire (Lister hospital)     | N                 | -                                   | -                        | -                    | -                           |
| East Suffolk and north Essex (Colchester)          | N                 | -                                   | -                        | -                    | -                           |
| East Suffolk and north Essex (Ipswich)             | N                 | -                                   | -                        | -                    | -                           |
| James Paget hospital                               | Y                 | N                                   | N                        | Y                    | Y                           |
| Mid Essex hospital (Broomfield)                    | N                 | -                                   | -                        | -                    | -                           |
| Norfolk and Norwich                                | Y                 | N                                   | N                        | Y                    | Y                           |
| North West Anglia (Peterborough city / Hinchbrook) | Y                 | N                                   | N                        | Y                    | Y                           |
| Queen Elizabeth kings Lynn                         | Y                 | N                                   | N                        | Y                    | Y                           |
| Southend University hospital                       | N                 | -                                   | -                        | -                    | -                           |
| West Hertfordshire (Watford)                       | Y                 | N                                   | N                        | Y                    | Y                           |
| West Suffolk hospital                              | N                 | -                                   | -                        | -                    | -                           |
| Dudley group NHS (Russells hall)                   | Y                 | N                                   | N                        | Y                    | Y                           |
| George Eliot hospital                              | Y                 | N                                   | N                        | Y                    | Y                           |
| Sandwell & west Birmingham                         | Y                 | N                                   | N                        | Y                    | Y                           |
| Shrewsbury & Telford                               | N                 | -                                   | -                        | -                    | -                           |
| South Warwickshire (Warwick)                       | N                 | -                                   | -                        | -                    | -                           |

| Stroke Service name                         | Complete data Y/N | Clinical Exercise Physiologists Y/N | Exercise Instructors Y/N | Physiotherapists Y/N | Occupational Therapists Y/N |
|---------------------------------------------|-------------------|-------------------------------------|--------------------------|----------------------|-----------------------------|
| The Royal wolverhampton (New Cross)         | N                 | -                                   | -                        | -                    | -                           |
| University hospitals Birmingham (Good hope) | Y                 | N                                   | N                        | Y                    | Y                           |
| University hospitals Birmingham (Solihull)  | Y                 | N                                   | N                        | Y                    | Y                           |
| Coventry university hospital                | Y                 | N                                   | N                        | Y                    | Y                           |
| North Midlands (Royal stoke)                | N                 | -                                   | -                        | -                    | -                           |
| Worcester Acute (Worcester Royal)           | Y                 | N                                   | N                        | Y                    | Y                           |
| Wye valley (Hereford)                       | Y                 | N                                   | N                        | Y                    | Y                           |
| Aintree Hospital                            | Y                 | N                                   | N                        | Y                    | Y                           |
| Countess of Chester                         | N                 | -                                   | -                        | -                    | -                           |
| Mid Cheshire (Leighton)                     | Y                 | N                                   | N                        | Y                    | Y                           |
| Royal Liverpool & Broad Green               | Y                 | N                                   | N                        | Y                    | Y                           |
| Southport & Ormskirk (Southport & Formby)   | N                 | -                                   | -                        | -                    | -                           |
| St Helens & Knowsley (Whiston)              | Y                 | N                                   | N                        | Y                    | Y                           |
| Warrington & Halton                         | Y                 | N                                   | N                        | Y                    | Y                           |
| Wirral University (Arrowe Park)             | Y                 | N                                   | N                        | Y                    | Y                           |
| Blackpool Teaching hospital                 | Y                 | N                                   | N                        | Y                    | Y                           |
| Bolton NHS (Bolton)                         | N                 | -                                   | -                        | -                    | -                           |
| East Lancashire (Blackburn)                 | Y                 | N                                   | N                        | Y                    | Y                           |
| Manchester NHS (Whyth)                      | Y                 | N                                   | N                        | Y                    | Y                           |
| Manchester NHS (Royal)                      | Y                 | N                                   | N                        | Y                    | Y                           |
| Manchester NHS (Trafford)                   | Y                 | N                                   | N                        | Y                    | Y                           |
| Pennine Acute (Fairfield)                   | Y                 | N                                   | N                        | Y                    | Y                           |
| Salford Royal                               | Y                 | N                                   | N                        | Y                    | Y                           |
| Stockport NHS (Stepping hill)               | Y                 | N                                   | N                        | Y                    | Y                           |
| Tameside & Glossop (Tameside)               | Y                 | N                                   | N                        | Y                    | Y                           |
| Morecambe (Furness general)                 | Y                 | N                                   | N                        | Y                    | Y                           |
| Morecambe (Royal Lancaster)                 | Y                 | N                                   | N                        | Y                    | Y                           |

| Stroke Service name                               | Complete data Y/N | Clinical Exercise Physiologists Y/N | Exercise Instructors Y/N | Physiotherapists Y/N | Occupational Therapists Y/N |
|---------------------------------------------------|-------------------|-------------------------------------|--------------------------|----------------------|-----------------------------|
| Wrightington, Wigan & Leigh (Royal Albert Edward) | Y                 | N                                   | N                        | Y                    | Y                           |
| University hospital and north Durham              | Y                 | N                                   | N                        | Y                    | Y                           |
| Gateshead health (QE)                             | Y                 | N                                   | N                        | Y                    | Y                           |
| Newcastle upon Tyne (Royal Victoria)              | Y                 | N                                   | N                        | Y                    | Y                           |
| North Cumbria (Cumberland)                        | Y                 | N                                   | N                        | Y                    | Y                           |
| North Cumbria (W.Cumberland)                      | Y                 | N                                   | N                        | Y                    | Y                           |
| North Tess & Hartlepool                           | Y                 | N                                   | N                        | Y                    | Y                           |
| Northumbria NHS (Hexham)                          | Y                 | N                                   | N                        | Y                    | Y                           |
| Northumbria NHS (North Tyneside)                  | Y                 | N                                   | N                        | Y                    | Y                           |
| Northumbria NHS (Wansbeck)                        | Y                 | N                                   | N                        | Y                    | Y                           |
| South Tyneside and Sunderland                     | Y                 | N                                   | N                        | Y                    | Y                           |
| South Tees NHS (James Cook)                       | Y                 | N                                   | N                        | Y                    | Y                           |
| Barnsely hospital                                 | Y                 | N                                   | N                        | Y                    | Y                           |
| Bradford teaching                                 | Y                 | N                                   | N                        | Y                    | Y                           |
| Calderdale and Huddersfield                       | Y                 | N                                   | N                        | Y                    | Y                           |
| Rotherham                                         | Y                 | N                                   | N                        | Y                    | Y                           |
| Harrogate & District                              | Y                 | N                                   | N                        | Y                    | Y                           |
| Hull University                                   | Y                 | N                                   | N                        | Y                    | Y                           |
| Leeds teaching hospital                           | Y                 | N                                   | N                        | Y                    | Y                           |
| Mid Yorkshire hospitals                           | Y                 | N                                   | N                        | Y                    | Y                           |
| Northern Lincolnshire and Goole                   | Y                 | N                                   | N                        | Y                    | Y                           |
| Doncaster and Bassetlaw                           | Y                 | N                                   | N                        | Y                    | Y                           |
| Sheffield teaching hospital                       | Y                 | N                                   | N                        | Y                    | Y                           |
| York teaching hospitals (York)                    | Y                 | N                                   | N                        | Y                    | Y                           |
| York teaching hospitals (Scarborough)             | Y                 | N                                   | N                        | Y                    | Y                           |
| Ashford and St Peters (St Peters)                 | Y                 | N                                   | N                        | Y                    | Y                           |
| Brighton and Sussex (Royal Sussex)                | Y                 | N                                   | N                        | Y                    | Y                           |

| Stroke Service name                            | Complete data Y/N | Clinical Exercise Physiologists Y/N | Exercise Instructors Y/N | Physiotherapists Y/N | Occupational Therapists Y/N |
|------------------------------------------------|-------------------|-------------------------------------|--------------------------|----------------------|-----------------------------|
| Dartford and Gravesham (Darent valley)         | Y                 | N                                   | N                        | Y                    | Y                           |
| East Kent hospitals (William Harvey)           | N                 | -                                   | -                        | -                    | -                           |
| East Kent hospitals (QE)                       | N                 | -                                   | -                        | -                    | -                           |
| East Sussex healthcare (Eastbourne)            | Y                 | N                                   | N                        | Y                    | Y                           |
| Epsom & St Helier University Hospitals (Epsom) | N                 | -                                   | -                        | -                    | -                           |
| Frimley health NHS                             | Y                 | N                                   | N                        | Y                    | Y                           |
| Maidstone & Tunbridge Wells (TB)               | N                 | -                                   | -                        | -                    | -                           |
| Maidstone & Tunbridge Wells (Maidstone)        | N                 | -                                   | -                        | -                    | -                           |
| Medway NHS                                     | Y                 | N                                   | N                        | Y                    | Y                           |
| Royal Surrey NHS                               | Y                 | N                                   | N                        | Y                    | Y                           |
| Western Sussex (St Richards)                   | Y                 | N                                   | N                        | Y                    | Y                           |
| Western Sussex (Worthing)                      | Y                 | N                                   | N                        | Y                    | Y                           |
| Gloucester hospitals (Royal)                   | Y                 | N                                   | N                        | Y                    | Y                           |
| Great Western hospitals (Swindon)              | Y                 | N                                   | N                        | Y                    | Y                           |
| North Bristol hospitals                        | Y                 | N                                   | N                        | Y                    | Y                           |
| Northern Devon Healthcare                      | Y                 | N                                   | N                        | Y                    | Y                           |
| Royal Cornwall                                 | Y                 | N                                   | N                        | Y                    | Y                           |
| Royal Devon and Exeter                         | Y                 | N                                   | N                        | Y                    | Y                           |
| Royal hospital Bath                            | Y                 | N                                   | N                        | Y                    | Y                           |
| Salisbury hospitals                            | Y                 | N                                   | N                        | Y                    | Y                           |
| Torbay and South Devon                         | Y                 | N                                   | N                        | Y                    | Y                           |
| University hospitals Plymouth (Derriford)      | Y                 | N                                   | N                        | Y                    | Y                           |
| Western Area health                            | Y                 | N                                   | N                        | Y                    | Y                           |
| Yeovil district hospital                       | Y                 | N                                   | N                        | Y                    | Y                           |
| Buckinghamshire healthcare (Wycombe)           | Y                 | N                                   | N                        | Y                    | Y                           |
| Oxford university hospitals                    | Y                 | N                                   | N                        | Y                    | Y                           |
| Royal Berkshire hospital                       | Y                 | N                                   | N                        | Y                    | Y                           |

| Stroke Service name                            | Complete data Y/N | Clinical Exercise Physiologists Y/N | Exercise Instructors Y/N | Physiotherapists Y/N | Occupational Therapists Y/N |
|------------------------------------------------|-------------------|-------------------------------------|--------------------------|----------------------|-----------------------------|
| Dorset county hospital                         | N                 | -                                   | -                        | -                    | -                           |
| Hampshire hospitals                            | Y                 | N                                   | N                        | Y                    | Y                           |
| Isle of wight (St Marys)                       | Y                 | N                                   | N                        | Y                    | Y                           |
| Poole hospitals                                | Y                 | N                                   | N                        | Y                    | Y                           |
| Portsmouth hospitals (QA)                      | Y                 | N                                   | N                        | Y                    | Y                           |
| Royal Bournemouth hospital                     | Y                 | N                                   | N                        | Y                    | Y                           |
| University hospital Southampton                | Y                 | N                                   | N                        | Y                    | Y                           |
| Belfast health & Social care (Royal Victoria)  | Y                 | N                                   | N                        | Y                    | Y                           |
| Northern health & social care                  | Y                 | N                                   | N                        | Y                    | Y                           |
| South eastern health & social care             | Y                 | N                                   | N                        | Y                    | Y                           |
| Southern health & social care                  | Y                 | N                                   | N                        | Y                    | Y                           |
| Western health & social care                   | Y                 | N                                   | N                        | Y                    | Y                           |
| Aneurin Bevan university health board (County) | Y                 | N                                   | Y                        | Y                    | Y                           |
| Betsi Cadwaladr (Wrexham)                      | Y                 | N                                   | Y                        | Y                    | Y                           |
| Cardiff & Vale university health board         | Y                 | N                                   | Y                        | Y                    | Y                           |
| Cwm Taf (Prince of Wales Hospital)             | Y                 | N                                   | Y                        | Y                    | Y                           |
| Hywel Dda University HB (Bronglais)            | Y                 | N                                   | Y                        | Y                    | Y                           |
| Dumfries & Galloway Cluden                     | Y                 | N                                   | Y                        | Y                    | Y                           |
| Borders general hospital Melrose               | Y                 | N                                   | Y                        | Y                    | Y                           |
| Ayrshire & Arran (Ayr Hospital)                | Y                 | N                                   | Y                        | Y                    | Y                           |
| South Lanarkshire                              | Y                 | N                                   | Y                        | Y                    | Y                           |
| Glasgow & Clyde (South Glasgow)                | Y                 | N                                   | Y                        | Y                    | Y                           |
| NHS Lothian                                    | Y                 | N                                   | Y                        | Y                    | Y                           |
| Falkirk & Sterling Forth valley                | Y                 | N                                   | Y                        | Y                    | Y                           |
| NHS Tayside Dundee                             | Y                 | N                                   | Y                        | Y                    | Y                           |
| Lorn & Islands, Oban                           | Y                 | N                                   | Y                        | Y                    | Y                           |
| Raigmore, Inverness                            | Y                 | N                                   | Y                        | Y                    | Y                           |

| <b>Stroke Service name</b> | <b>Complete data Y/N</b> | <b>Clinical Exercise Physiologists Y/N</b> | <b>Exercise Instructors Y/N</b> | <b>Physiotherapists Y/N</b> | <b>Occupational Therapists Y/N</b> |
|----------------------------|--------------------------|--------------------------------------------|---------------------------------|-----------------------------|------------------------------------|
| Aberdeen royal infirmary   | Y                        | N                                          | Y                               | Y                           | Y                                  |
